# Supplementary material for: Cathelicidin Insufficiency in Patients with Fatal Leptospirosis
Source: PLoS Pathog. 2016 Nov 3;12(11):e1005943. doi: 10.1371/journal.ppat.1005943 (PMC5094754; doi:10.1371/journal.ppat.1005943)
Supplement: S2 Table — (XLSX) [file ppat.1005943.s005.xlsx]

## Sheet: Table S2 GOTerms DAVID
Table S2. All significant Functional GO terms for DE transcripts in Acute vs Convalescence (SvC) and Deceased vs Survivors (DvS).
Expression Profile	Cluster	TermA		-log (p value)	Genes	Fold Enrichment	Benjamini	FDR
Higher SvC	1	GO:0000279	M phase	12.3924	TIPIN, PTTG2, PTTG1, KIF2C, SPC25, DUSP13, OIP5, LOC100133673, BUB1, CDCA2, PIWIL4, TUBG1, CDCA5, ASPM, TRIP13, CDK1, PDS5A, DLGAP5, CENPF, NUSAP1, BIRC5, PBK, UBE2C, RAD54L, RAD51, CCNB1, CCNB2, SLC26A8, SPAG5, ZWINT, STMN1	5.4951	5.67574e-10	6.67566e-10
Higher SvC	1	GO:0022403	Cell cycle phase	12.206	BCAT1, TIPIN, PTTG2, PTTG1, KIF2C, SPC25, DUSP13, OIP5, LOC100133673, BUB1, CDCA2, TUBG1, PIWIL4, CDCA5, ASPM, TRIP13, CDK1, PDS5A, DLGAP5, CENPF, NUSAP1, BIRC5, PBK, UBE2C, RAD54L, RAD51, CCNB1, INHBA, CCNB2, SLC26A8, SPAG5, ZWINT, STMN1, GADD45A	4.81863	4.35985e-10	1.02558e-09
Higher SvC	1	GO:0007049	Cell cycle	9.88408	BCAT1, S100A6, E2F7, TIPIN, PTTG2, PTTG1, CDT1, KIF2C, SPC25, CDC45, DUSP13, HJURP, LOC100133673, OIP5, BUB1, CDCA2, TUBG1, PIWIL4, CDCA5, ASPM, TRIP13, CDK1, PDS5A, DLGAP5, CENPF, NUSAP1, BIRC5, PBK, UBE2C, RAD54L, RAD51, CCNB1, INHBA, UHRF1, CCNB2, SLC26A8, SPAG5, ZWINT, PHGDH, G0S2, STMN1, GADD45A	3.21345	6.09867e-08	2.15192e-07
Higher SvC	1	GO:0007067	Mitosis	9.45906	CDK1, PDS5A, DLGAP5, TIPIN, CENPF, NUSAP1, PTTG2, BIRC5, PBK, PTTG1, UBE2C, CCNB1, KIF2C, SPC25, CCNB2, OIP5, SPAG5, ZWINT, CDCA2, BUB1, CDCA5, ASPM	5.95073	1.21707e-07	5.72592e-07
Higher SvC	1	GO:0000280	Nuclear division	9.45906	CDK1, PDS5A, DLGAP5, TIPIN, CENPF, NUSAP1, PTTG2, BIRC5, PBK, PTTG1, UBE2C, CCNB1, KIF2C, SPC25, CCNB2, OIP5, SPAG5, ZWINT, CDCA2, BUB1, CDCA5, ASPM	5.95073	1.21707e-07	5.72592e-07
Higher SvC	1	GO:0022402	Cell cycle process	9.40266	BCAT1, TIPIN, PTTG2, PTTG1, KIF2C, SPC25, DUSP13, OIP5, LOC100133673, BUB1, CDCA2, TUBG1, PIWIL4, CDCA5, ASPM, TRIP13, CDK1, PDS5A, DLGAP5, CENPF, NUSAP1, BIRC5, PBK, UBE2C, RAD54L, RAD51, CCNB1, INHBA, CCNB2, SLC26A8, SPAG5, ZWINT, PHGDH, STMN1, GADD45A	3.64116	1.10868e-07	6.51998e-07
Higher SvC	1	GO:0000087	M phase of mitotic cell cycle	9.32136	CDK1, PDS5A, DLGAP5, TIPIN, CENPF, NUSAP1, PTTG2, BIRC5, PBK, PTTG1, UBE2C, CCNB1, KIF2C, SPC25, CCNB2, OIP5, SPAG5, ZWINT, CDCA2, BUB1, CDCA5, ASPM	5.84447	1.11411e-07	7.86228e-07
Higher SvC	1	GO:0048285	Organelle fission	9.15429	CDK1, PDS5A, DLGAP5, TIPIN, CENPF, NUSAP1, PTTG2, BIRC5, PBK, PTTG1, UBE2C, CCNB1, KIF2C, SPC25, CCNB2, OIP5, SPAG5, ZWINT, CDCA2, BUB1, CDCA5, ASPM	5.71686	1.40297e-07	1.15509e-06
Higher SvC	1	GO:0000278	Mitotic cell cycle	8.25862	BCAT1, TIPIN, PTTG2, PTTG1, SPC25, KIF2C, OIP5, CDCA2, BUB1, CDCA5, ASPM, CDK1, PDS5A, DLGAP5, NUSAP1, CENPF, BIRC5, PBK, UBE2C, CCNB1, INHBA, CCNB2, SPAG5, ZWINT, STMN1, GADD45A	4.21223	7.72363e-07	9.08429e-06
Higher SvC	1	GO:0051301	Cell division	5.28522	CDK1, PDS5A, TIPIN, CENPF, NUSAP1, PTTG2, BIRC5, PTTG1, UBE2C, CCNB1, SPC25, CCNB2, OIP5, SPAG5, ZWINT, CDCA2, BUB1, CDCA5, ASPM	3.80386	0.000382284	0.00854425
Higher SvC	1	GO:0051726	Regulation of cell cycle	3.54895	CDK1, DLGAP5, TIPIN, CENPF, NUSAP1, BIRC5, UBE2C, CDT1, CCNB1, INHBA, CDC45, MAPK14, ZWINT, GADD45G, BUB1, GADD45A	3.01346	0.0151105	0.464528
Higher SvC	2	GO:0005694	Chromosome	9.56728	HIST2H2AA3, HIST4H4, HIST2H2AA4, HIST2H4A, HIST2H4B, KIF2C, OIP5, LOC100133673, HIST1H2BI, TUBG1, CDCA5, HIST1H1E, HIST1H1B, RAD51, SPAG5, ZWINT, HIST1H2AB, HMGB2, HIST1H4L, HIST1H4K, HIST1H2AG, HIST1H2AD, HIST1H2AE, TIPIN, SPC25, HIST1H4A, HIST1H4B, HJURP, HIST1H4E, BUB1, HIST1H4F, HIST1H4C, HIST1H4D, HIST1H4I, HIST1H4J, HIST1H4H, HIST2H3A, CENPN, HIST1H2BB, HIST1H3J, CENPM, HIST1H2BC, PDS5A, HI…	3.91543	6.36481e-08	3.48424e-07
Higher SvC	2	GO:0044427	Chromosomal part	9.30407	HIST2H2AA3, HIST4H4, HIST2H2AA4, HIST2H4A, HIST2H4B, KIF2C, OIP5, HIST1H2BI, CDCA5, HIST1H1E, HIST1H1B, SPAG5, ZWINT, HIST1H2AB, HIST1H4L, HIST1H4K, HIST1H2AG, HIST1H2AD, HIST1H2AE, TIPIN, SPC25, HIST1H4A, HIST1H4B, HJURP, HIST1H4E, BUB1, HIST1H4F, HIST1H4C, HIST1H4D, HIST1H4I, HIST1H4J, HIST1H4H, HIST2H3A, CENPN, HIST1H2BB, HIST1H3J, HIST1H2BC, CENPM, PDS5A, HIST1H2BE, HIST1H2BF, HIST1H2BG, HIST…	4.21451	5.83403e-08	6.38736e-07
Higher SvC	2	GO:0000777	Condensed chromosome kinetochore	7.34508	SPC25, KIF2C, CENPN, CENPM, HJURP, SPAG5, ZWINT, BUB1, CASC5, CENPF, MLF1IP	11.019	3.53886e-06	5.81177e-05
Higher SvC	2	GO:0000779	condensed chromosome, centromeric region	6.79025	SPC25, KIF2C, CENPN, CENPM, HJURP, SPAG5, ZWINT, BUB1, CASC5, CENPF, MLF1IP	9.68333	7.61817e-06	0.000208519
Higher SvC	2	GO:0000775	chromosome, centromeric region	6.7049	CENPN, CENPM, CASC5, CENPF, BIRC5, MLF1IP, SPC25, KIF2C, OIP5, HJURP, SPAG5, ZWINT, BUB1, C6ORF173	6.55968	7.72711e-06	0.0002538
Higher SvC	2	GO:0000793	condensed chromosome	6.50309	CENPN, CENPM, HMGB2, CASC5, CENPF, MLF1IP, RAD51, SPC25, KIF2C, LOC100133673, HJURP, SPAG5, ZWINT, BUB1, TUBG1	6.30543	1.05409e-05	0.000403923
Higher SvC	2	GO:0000776	kinetochore	6.1456	SPC25, KIF2C, CENPN, CENPM, HJURP, SPAG5, ZWINT, BUB1, CASC5, CENPF, MLF1IP	8.3	1.86731e-05	0.000919992
Higher SvC	3	GO:0065004	Protein-DNA complex assembly	8.70855	HIST2H2AA3, HIST2H2AA4, HIST4H4, HIST2H4A, HIST2H4B, HIST1H2BI, HIST1H1E, HIST1H1B, HIST1H2AB, HIST1H4L, HMGB2, HIST1H4K, HIST1H2AG, HIST1H2AD, HIST1H2AE, HIST1H4A, HJURP, HIST1H4B, HIST1H4E, HIST1H4F, HIST1H4C, HIST1H4D, HIST1H4I, HIST1H4J, HIST1H4H, HIST2H3A, HIST1H3J, HIST1H2BB, HIST1H2BC, HIST1H2BE, HIST1H2BF, HIST1H2BG, HIST1H2BH, CENPF, HIST2H3C, HIST2H3D, HIST1H3A, HIST1H3B, HIST1H2AI, HIS…	9.59093	3.42605e-07	3.22369e-06
Higher SvC	3	GO:0006323	DNA packaging	8.30481	HIST2H2AA3, HIST2H2AA4, HIST4H4, HIST2H4A, HIST2H4B, HIST1H2BI, CDCA5, HIST1H1E, HIST1H1B, NUSAP1, HIST1H2AB, HIST1H4L, HMGB2, HIST1H4K, HIST1H2AG, HIST1H2AD, HIST1H2AE, HIST1H4A, HJURP, HIST1H4B, HIST1H4E, HIST1H4F, HIST1H4C, HIST1H4D, HIST1H4I, HIST1H4J, HIST1H4H, HIST2H3A, HIST1H3J, HIST1H2BB, HIST1H2BC, HIST1H2BE, HIST1H2BF, HIST1H2BG, HIST1H2BH, HIST2H3C, HIST2H3D, HIST1H3A, HIST1H3B, HIST1H…	7.99244	7.71596e-07	8.16774e-06
Higher SvC	3	GO:0006334	nucleosome assembly	8.07971	HIST2H2AA3, HIST2H2AA4, HIST4H4, HIST2H4A, HIST2H4B, HIST1H2BI, HIST1H1E, HIST1H1B, HIST1H2AB, HIST1H4L, HMGB2, HIST1H4K, HIST1H2AG, HIST1H2AD, HIST1H2AE, HIST1H4A, HJURP, HIST1H4B, HIST1H4E, HIST1H4F, HIST1H4C, HIST1H4D, HIST1H4I, HIST1H4J, HIST1H4H, HIST2H3A, HIST1H3J, HIST1H2BB, HIST1H2BC, HIST1H2BE, HIST1H2BF, HIST1H2BG, HIST1H2BH, HIST2H3C, HIST2H3D, HIST1H3A, HIST1H3B, HIST1H2AI, HIST1H3C, …	9.64801	1.06006e-06	1.37149e-05
Higher SvC	3	GO:0031497	chromatin assembly	7.90214	HIST2H2AA3, HIST2H2AA4, HIST4H4, HIST2H4A, HIST2H4B, HIST1H2BI, HIST1H1E, HIST1H1B, HIST1H2AB, HIST1H4L, HMGB2, HIST1H4K, HIST1H2AG, HIST1H2AD, HIST1H2AE, HIST1H4A, HJURP, HIST1H4B, HIST1H4E, HIST1H4F, HIST1H4C, HIST1H4D, HIST1H4I, HIST1H4J, HIST1H4H, HIST2H3A, HIST1H3J, HIST1H2BB, HIST1H2BC, HIST1H2BE, HIST1H2BF, HIST1H2BG, HIST1H2BH, HIST2H3C, HIST2H3D, HIST1H3A, HIST1H3B, HIST1H2AI, HIST1H3C, …	9.31532	1.46256e-06	2.06426e-05
Higher SvC	3	GO:0034728	nucleosome organization	7.56781	HIST2H2AA3, HIST2H2AA4, HIST4H4, HIST2H4A, HIST2H4B, HIST1H2BI, HIST1H1E, HIST1H1B, HIST1H2AB, HIST1H4L, HMGB2, HIST1H4K, HIST1H2AG, HIST1H2AD, HIST1H2AE, HIST1H4A, HJURP, HIST1H4B, HIST1H4E, HIST1H4F, HIST1H4C, HIST1H4D, HIST1H4I, HIST1H4J, HIST1H4H, HIST2H3A, HIST1H3J, HIST1H2BB, HIST1H2BC, HIST1H2BE, HIST1H2BF, HIST1H2BG, HIST1H2BH, HIST2H3C, HIST2H3D, HIST1H3A, HIST1H3B, HIST1H2AI, HIST1H3C, …	8.71434	2.91529e-06	4.45754e-05
Higher SvC	3	GO:0000786	nucleosome	6.98848	HIST1H2AB, HIST2H2AA3, HIST2H2AA4, HIST4H4, HIST1H4L, HIST1H4K, HIST1H2AG, HIST1H2AD, HIST1H2AE, HIST2H4A, HIST2H4B, HIST1H4A, HIST1H4B, HIST1H2BI, HIST1H4E, HIST1H4F, HIST1H4C, HIST1H4D, HIST1H4I, HIST1H4J, HIST1H4H, HIST2H3A, HIST1H2BB, HIST1H3J, HIST1H2BC, HIST1H1E, HIST1H2BE, HIST1H2BF, HIST1H1B, HIST1H2BG, HIST1H2BH, HIST2H3C, HIST2H3D, HIST1H3A, HIST1H2AI, HIST1H3B, HIST1H2AH, HIST1H3C, HIS…	10.1444	6.03295e-06	0.000132103
Higher SvC	3	GO:0006333	chromatin assembly or disassembly	6.06171	HIST2H2AA3, HIST2H2AA4, HIST4H4, HIST2H4A, HIST2H4B, HIST1H2BI, HIST1H1E, HIST1H1B, HIST1H2AB, HIST1H4L, HMGB2, HIST1H4K, HIST1H2AG, HIST1H2AD, HIST1H2AE, HIST1H4A, HJURP, HIST1H4B, HIST1H4E, HIST1H4F, HIST1H4C, HIST1H4D, HIST1H4I, HIST1H4J, HIST1H4H, HIST2H3A, HIST1H3J, HIST1H2BB, HIST1H2BC, HIST1H2BE, HIST1H2BF, HIST1H2BG, HIST1H2BH, HIST2H3C, HIST2H3D, HIST1H3A, HIST1H3B, HIST1H2AI, HIST1H3C, …	6.38136	6.75213e-05	0.00142953
Higher SvC	3	GO:0032993	protein-DNA complex	5.695	HIST1H2AB, HIST2H2AA3, HIST2H2AA4, HIST4H4, HIST1H4L, HIST1H4K, HIST1H2AG, HIST1H2AD, HIST1H2AE, HIST2H4A, HIST2H4B, HIST1H4A, HIST1H4B, HIST1H2BI, HIST1H4E, HIST1H4F, HIST1H4C, HIST1H4D, HIST1H4I, HIST1H4J, HIST1H4H, HIST2H3A, HIST1H2BB, HIST1H3J, HIST1H2BC, HIST1H1E, HIST1H2BE, HIST1H2BF, HIST1H1B, HIST1H2BG, HIST1H2BH, HIST2H3C, HIST2H3D, HIST1H3A, HIST1H2AI, HIST1H3B, HIST1H2AH, HIST1H3C, HIS…	7.4314	4.74301e-05	0.00259646
Higher SvC	3	GO:0000785	chromatin	5.05477	HIST2H2AA3, HIST2H2AA4, HIST4H4, HIST2H4A, HIST2H4B, OIP5, HIST1H2BI, HIST1H1E, HIST1H1B, HIST1H2AB, HIST1H4L, HIST1H4K, HIST1H2AG, HIST1H2AD, HIST1H2AE, TIPIN, HIST1H4A, HIST1H4B, HIST1H4E, HIST1H4F, HIST1H4C, HIST1H4D, HIST1H4I, HIST1H4J, HIST1H4H, HIST2H3A, HIST1H3J, HIST1H2BB, HIST1H2BC, PDS5A, HIST1H2BE, HIST1H2BF, HIST1H2BG, HIST1H2BH, CENPF, HIST2H3C, HIST2H3D, HIST1H3A, HIST1H3B, HIST1H2A…	4.3575	0.000188306	0.0113395
Higher SvC	3	GO:0051276	chromosome organization	4.47992	HIST2H2AA3, HIST2H2AA4, HIST4H4, PTTG2, PTTG1, HIST2H4A, HIST2H4B, SMARCD3, HIST1H2BI, CDCA5, HIST1H1E, HIST1H1B, NUSAP1, PADI4, ZWINT, HIST1H2AB, HIST1H4L, HMGB2, HIST1H4K, HIST1H2AG, HIST1H2AD, HIST1H2AE, HIST1H4A, HJURP, HIST1H4B, HIST1H4E, HIST1H4F, HIST1H4C, HIST1H4D, HIST1H4I, HIST1H4J, HIST1H4H, HIST2H3A, HIST1H2BB, HIST1H3J, HIST1H2BC, HIST1H2BE, HIST1H2BF, HIST1H2BG, DLGAP5, HIST1H2BH, C…	2.82784	0.00220711	0.0545599
Higher SvC	3	GO:0034621	cellular macromolecular complex subunit organization	4.21686	HIST2H2AA3, HIST2H2AA4, HIST4H4, HIST2H4A, HIST2H4B, KIF2C, LOC100133673, HIST1H2BI, TUBG1, HIST1H1E, HIST1H1B, STMN1, HIST1H2AB, HIST1H4L, HMGB2, HIST1H4K, HIST1H2AG, HIST1H2AD, HIST1H2AE, HIST1H4A, HJURP, HIST1H4B, HIST1H4E, HIST1H4F, HIST1H4C, HIST1H4D, HIST1H4I, HIST1H4J, HIST1H4H, HIST2H3A, HIST1H2BB, HIST1H3J, HIST1H2BC, HIST1H2BE, HIST1H2BF, HIST1H2BG, HIST1H2BH, IPO11, CENPF, HIST2H3C, HI…	3.14324	0.00385769	0.0999636
Higher SvC	3	GO:0034622	Cellular macromolecular complex assembly	3.73607	HIST2H2AA3, HIST2H2AA4, HIST4H4, HIST2H4A, HIST2H4B, LOC100133673, HIST1H2BI, TUBG1, HIST1H1E, HIST1H1B, HIST1H2AB, HIST1H4L, HMGB2, HIST1H4K, HIST1H2AG, HIST1H2AD, HIST1H2AE, HIST1H4A, HJURP, HIST1H4B, HIST1H4E, HIST1H4F, HIST1H4C, HIST1H4D, HIST1H4I, HIST1H4J, HIST1H4H, HIST2H3A, HIST1H3J, HIST1H2BB, HIST1H2BC, HIST1H2BE, HIST1H2BF, HIST1H2BG, HIST1H2BH, IPO11, CENPF, HIST2H3C, HIST2H3D, HIST1H…	3.13665	0.0106629	0.302152
Higher SvC	4	GO:0009617	Response to bacterium	7.10138	HIST1H2BC, HIST1H2BE, RNASE3, CEBPE, HIST1H2BF, HIST1H2BG, CAMP, PGLYRP1, CHIT1, S100A12, AZU1, IRAK3, NLRC4, BPI, DEFA1B, MAPK14, HIST1H2BI, DEFA4, LTF, DEFA1, MGST1, CTSG	5.49118	7.92364e-06	0.000130474
Higher SvC	4	GO:0006952	Defense response	6.79438	S100A8, CLU, S100A9, PGLYRP1, TLR5, AZU1, NLRC4, DEFA1B, HIST1H2BI, LTF, TFF3, VNN1, DDAH2, PTX3, CR1, HIST1H2BC, CEBPE, OLR1, HIST1H2BE, RNASE3, HIST1H2BF, CAMP, HIST1H2BG, S100A12, C1QA, INHBA, C1QB, BPI, P2RX1, DEFA4, MPO, DEFA1, LTA4H, VSIG4, CTSG	3.04103	1.49956e-05	0.000264562
Higher SvC	4	GO:0042742	Defense response to bacterium	6.65792	HIST1H2BC, RNASE3, CEBPE, HIST1H2BE, HIST1H2BF, HIST1H2BG, CAMP, PGLYRP1, S100A12, AZU1, NLRC4, BPI, DEFA1B, HIST1H2BI, DEFA4, LTF, DEFA1, CTSG	7.23601	1.81163e-05	0.000362235
Higher SvC	5	GO:0003823	Antigen binding	6.99168	IGLV1-40, IGHG1, IGHG2, IGHG3, IGHG4, IGLV1-44, IGHV@, IGHM, IGHV3-23, IGHA1, IGHA2, IGKC, IGL@, IGJ, LOC652493, IGLV2-11, IGHV3-11, IGHV3-7, IGKV4-1, IGH@, IGHV4-31, LOC650405, IGLC2, LOC100130100, IGLC1, IGLC3, IGLV3-21	12.2021	4.3933e-05	0.000143723
Higher SvC	6	GO:0005576	Extracellular region	6.20895	IGLV1-40, IGHG1, IGHG2, IGHG3, IGHG4, IGLV1-44, FAM20A, IGLV4-60, IGHV@, MMP9, MMP8, PGLYRP1, PRDX4, IGHM, IGLV2-23, HPSE, CEACAM8, LILRA5, LTF, IGLV8-61, IGL@, CAMP, CRISP2, ELANE, LOC652493, TCN1, PCOLCE2, C1QA, IGLV2-11, IGHV3-11, RETN, C1QB, INHBA, BPI, GRN, DEFA4, SLPI, IGLV3-27, IGKV4-1, IGLV4-69, DEFA1, IGH@, IGLV3-25, CR1L, IGLV3-21, OLFM4, PRSSL1, CLU, PLBD1, CHIT1, AZU1, COL17A1, FOLR3,…	1.84995	1.81563e-05	0.000795139
Higher SvC	7	GO:0007059	Chromosome segregation	5.25939	SPC25, HJURP, ZWINT, DLGAP5, CENPF, NUSAP1, BIRC5, PTTG2, PTTG1, CDCA5, SRPK1	7.69642	0.000385421	0.00906774
Higher SvC	7	GO:0000922	Spindle pole	3.58211	LOC100133673, MAPK14, DLGAP5, BUB1, CENPF, TUBG1, ASPM	10.2529	0.00511352	0.336206
Higher SvC	8	GO:0000075	Cell cycle checkpoint	3.99485	CDK1, CDC45, MAPK14, ZWINT, BUB1, TIPIN, CENPF, BIRC5, CDT1	6.16559	0.00614535	0.166617
Higher SvC	9	GO:0006954	Inflammatory response	3.63519	CR1, S100A8, OLR1, CLU, S100A9, TLR5, S100A12, AZU1, C1QA, C1QB, NLRC4, P2RX1, VNN1, LTA4H, VSIG4, PTX3	3.0691	0.0128987	0.381016
Higher SvC	9	GO:0051605	protein maturation by peptide bond cleavage	3.35334	C1QA, C1QB, CR1, SEC11C, CLU, SPCS3, VSIG4, SRGN	5.79916	0.022743	0.727917
Higher CvS	1	GO:0044421	Extracellular region part	4.1701	LALBA, GDF7, SPOCK2, C3, ERBB3, CRLF1, GDF5, RNH1, CCL5, VIT, CXCL12, CCL4, GPC4, WNT4, ISG15, KLKB1, IL15RA, TFF1, LAMB1, COL11A2, FGFBP2, VWA1, FGF1, SPON2, HGFAC, LTA, NYX, MUC2, IL8, GNLY, SERPING1, LAMA3, CD40LG, CPXM1, IL5RA, SCGB3A1, OTOA, LIPE	1.99195	0.0194116	0.0898195
Higher DvS Group 3	1	GO:0004908	Interleukin-1 receptor activity	4.40886	IL18R1, IL1R2, IL1R1, IL1RAP	53.7598	0.0162114	0.0547607
Higher DvS Group 3	1	GO:0019966	Interleukin-1 binding	3.88385	IL18R1, IL1R2, IL1R1, IL1RAP	37.6319	0.0270044	0.183324
Higher DvS Group 3	2	GO:0044272	Sulfur compound biosynthetic process	4.88354	TPK1, NDST2, CSGALNACT2, GGTLC2, GGT1, DSE, CBS	13.2442	0.0180879	0.0215343
Higher DvS Group 2	1	GO:0006955	Immune response	7.66777	774123, 821214, 779841, 823923, 779908, 824622, 788230, 823872, 824090, 779119, 818966, 804890	8.71369	6.81214e-06	2.89577e-05
Higher DvS Group 2	1	GO:0003823	Antigen binding	7.50901	779841, 823923, 779908, 824622, 779119, 804890	60.4798	2.97344e-06	3.41139e-05
Higher DvS Group 1	1	GO:0002504	Antigen processing/MHC II presentation	8.41098	HLA-DPA1, HLA-DPB1, HLA-DMB, HLA-DOA, HLA-DMA, CD74, HLA-DRA	50.3434	3.31496e-06	6.00954e-06
Higher DvS Group 1	1	GO:0006955	Immune response	7.08961	ST6GAL1, CD8B, PF4, HLA-DMB, CCL5, HLA-DMA, TLR7, CD74, PPBP, LAX1, CD40LG, HLA-DPA1, HLA-DPB1, HLA-DOA, CD27, HLA-DRA	5.50338	2.31589e-05	0.000125952
Higher DvS Group 1	1	GO:0042613	MHC class II protein complex	6.71606	HLA-DPA1, HLA-DPB1, HLA-DMB, HLA-DOA, HLA-DMA, HLA-DRA	44.0759	3.30723e-05	0.000235046
Higher DvS Group 1	1	GO:0019882	Antigen processing and presentation	5.94741	HLA-DPA1, HLA-DPB1, HLA-DMB, HLA-DOA, HLA-DMA, CD74, HLA-DRA	20.0161	0.000192767	0.00174744
Higher DvS Group 1	1	GO:0032395	MHC class II receptor activity	5.9094	HLA-DPA1, HLA-DPB1, HLA-DOA, HLA-DMA, HLA-DRA	58.9065	0.000213107	0.0015074
Higher DvS Group 1	1	GO:0002495	Antigen processing and presentation of peptide antigen via MHC class II	5.43086	HLA-DOA, HLA-DMA, CD74, HLA-DRA	118.667	0.000452273	0.00574046
Higher DvS Group 1	1	GO:0019886~antigen processing and presentation of exogenous peptide antigen via MHC class II	Antigen processing and presentation of exogenous peptide antigen via MHC class II	5.43086	HLA-DOA, HLA-DMA, CD74, HLA-DRA	118.667	0.000452273	0.00574046
Higher DvS Group 1	1	GO:0042287	MHC protein binding	5.40421	CD8B, HLA-DMB, HLA-DMA, CD74, HLA-DRA	44.769	0.000340983	0.00482408
Higher DvS Group 1	1	GO:0042611	MHC protein complex	5.21164	HLA-DPA1, HLA-DPB1, HLA-DMB, HLA-DOA, HLA-DMA, HLA-DRA	22.4246	0.000528135	0.00750854
Higher DvS Group 1	1	GO:0002478	Antigen processing and presentation of exogenous peptide antigen	4.9654	HLA-DOA, HLA-DMA, CD74, HLA-DRA	86.303	0.00102706	0.0167644
Higher DvS Group 1	1	GO:0019884	Antigen processing and presentation of exogenous peptide antigen	4.62561	HLA-DOA, HLA-DMA, CD74, HLA-DRA	67.8095	0.00168386	0.0366552
Higher DvS Group 1	1	GO:0042288	MHC class I protein binding	4.36504	CD8B, HLA-DMB, HLA-DMA, HLA-DRA	55.9612	0.00248516	0.0527825
Higher DvS Group 1	1	GO:0048002	Antigen processing and presentation of peptide antigen	3.68922	HLA-DOA, HLA-DMA, CD74, HLA-DRA	33.9048	0.00790928	0.316196
Higher DvS Group 1	1	GO:0042825	TAP complex	3.36313	HLA-DMB, HLA-DMA, HLA-DRA	91.3	0.0184669	0.528479
Higher DvS Group 1	1	GO:0042824	MHC class I peptide loading comp	3.13163	HLA-DMB, HLA-DMA, HLA-DRA	71.0111	0.025095	0.899054
Higher DvS Group 1	2	GO:0001775	Cell activation	7.68514	GIMAP5, GP1BB, CD8B, CD40LG, LAX1, BCL11B, CD2, PF4, TLR7, HLA-DMA, CD74, HSH2D	9.92334	8.81622e-06	3.19651e-05
Higher DvS Group 1	2	GO:0045321	Leukocyte activation	6.22992	GIMAP5, CD8B, CD40LG, LAX1, BCL11B, CD2, TLR7, HLA-DMA, CD74, HSH2D	9.80716	0.000125734	0.000911804
Higher DvS Group 1	2	GO:0046649	Lymphocyte activation	5.83042	GIMAP5, CD8B, CD40LG, LAX1, BCL11B, CD2, HLA-DMA, CD74, HSH2D	10.7337	0.000210303	0.0022877
Higher DvS Group 1	2	GO:0045619	Regulation of lymphocyte differentiation	5.22696	GIMAP5, CD2, HLA-DOA, HLA-DMA, CD74, CD27	22.6032	0.000632802	0.00917988
Higher DvS Group 1	2	GO:0042110	T cell activation	4.89111	GIMAP5, CD8B, BCL11B, CD2, HLA-DMA, CD74, HSH2D	13.1852	0.00109677	0.0198917
Higher DvS Group 1	2	GO:0051249	Regulation of lymphocyte activation	4.49417	GIMAP5, LAX1, CD2, HLA-DOA, HLA-DMA, CD74, CD27	11.2252	0.00210326	0.0496074
Higher DvS Group 1	2	GO:0002684	Positive regulation of immune system process	4.27434	GIMAP5, LAX1, CD2, TLR7, HLA-DMA, CD74, CD27, HLA-DRA	7.97759	0.00323817	0.0822838
Higher DvS Group 1	2	GO:0045580	Regulation of T cell differentiation	4.24454	GIMAP5, CD2, HLA-DOA, HLA-DMA, CD74	23.268	0.00323695	0.0881254
Higher DvS Group 1	2	GO:0002694	Regulation of leukocyte activation	4.215	GIMAP5, LAX1, CD2, HLA-DOA, HLA-DMA, CD74, CD27	10.008	0.00324821	0.0943252
Higher DvS Group 1	2	GO:0016064	Immunoglobulin mediated immune response	4.14627	CD40LG, HLA-DMA, CD74, CD27, HLA-DRA	21.9753	0.00358073	0.110489
Higher DvS Group 1	2	GO:0050865	Regulation of cell activation	4.08775	GIMAP5, LAX1, CD2, HLA-DOA, HLA-DMA, CD74, CD27	9.49333	0.00386909	0.126418
Higher DvS Group 1	2	GO:0019724	B cell mediated immunity	4.08396	CD40LG, HLA-DMA, CD74, CD27, HLA-DRA	21.1905	0.0036979	0.127526
Higher DvS Group 1	2	GO:0050863	Regulation of T cell activation	3.92334	GIMAP5, LAX1, CD2, HLA-DOA, HLA-DMA, CD74	12.1709	0.00508173	0.184548
Higher DvS Group 1	2	GO:0002449	Lymphocyte mediated immunity	3.70531	CD40LG, HLA-DMA, CD74, CD27, HLA-DRA	16.9524	0.00798426	0.304714
Higher DvS Group 1	2	GO:0002250	Adaptive immune response	3.54556	CD40LG, HLA-DMA, CD74, CD27, HLA-DRA	15.4113	0.0105181	0.43991
Higher DvS Group 1	2	GO:0002460	Adaptive immune response based on somatic recombination of immune receptors built from immunoglobulin superfamily domains	3.54556	CD40LG, HLA-DMA, CD74, CD27, HLA-DRA	15.4113	0.0105181	0.43991
Higher DvS Group 1	2	GO:0045621	Positive regulation of lymphocyte differentiation	3.39757	GIMAP5, HLA-DMA, CD74, CD27	27.1238	0.0141474	0.618009
Higher DvS Group 1	2	GO:0048584	Positive regulation of response to stimulous	3.38268	GIMAP5, LAX1, CCL5, TLR7, HLA-DMA, CD27, HLA-DRA	7.03955	0.0140557	0.639488
Higher DvS Group 1	2	GO:0002443	Leukocyte mediated immunity	3.36186	CD40LG, HLA-DMA, CD74, CD27, HLA-DRA	13.7984	0.0141783	0.670804
Higher DvS Group 1	3	GO:0002252	Immune effector process	4.73855	CD40LG, LAX1, TLR7, HLA-DMA, CD74, CD27, HLA-DRA	12.398	0.00141649	0.0282627
Higher DvS Group 1	4	GO:0044459	Plasma membrane part	3.73163	CD8B, TNFRSF25, GNG11, EVL, CXCR3, HLA-DMB, HLA-DMA, LDLRAP1, CD74, ADRB2, SYNE2, GP1BB, CD40LG, CCR3, SDPR, CX3CR1, CD2, HLA-DPA1, HLA-DPB1, HLA-DOA, RASA3, CD27, HLA-DRA	2.22413	0.0105807	0.226534
Higher DvS Group 1	5	GO:0006935	Chemotaxis	3.29199	PPBP, CCR3, CX3CR1, PF4, CXCR3, CCL5	8.9	0.0160217	0.787447
Higher DvS Group 1	5	GO:0042330	Taxis	3.29199	PPBP, CCR3, CX3CR1, PF4, CXCR3, CCL5	8.9	0.0160217	0.787447
A Bolded groups represent the GOTerm with the smallest p-value within a Cluster.
