# Supplementary material for: Cathelicidin Insufficiency in Patients with Fatal Leptospirosis
Source: PLoS Pathog. 2016 Nov 3;12(11):e1005943. doi: 10.1371/journal.ppat.1005943 (PMC5094754; doi:10.1371/journal.ppat.1005943)
Supplement: S3 Table — (XLSX) [file ppat.1005943.s006.xlsx]

## Sheet: Table S3 unique DvS
Table S3: Differentially expressed transcripts in Deceased vs Survivors (DvS).
Probe	Ensembl ID	Gene Symbol	Gene Description	DvS_foldchA	DvS_qvalB	Group	Found in SvC
A_23_P253791	ENSG00000164047	CAMP	cathelicidin antimicrobial peptide (CAMP), mRNA	0.0568972	0	Group 2	Yes
A_23_P137665	ENSG00000133048	CHI3L1	chitinase 3-like 1 (cartilage glycoprotein-39) (CHI3L1), mRNA	0.0916999	0	Group 1	No
A_33_P3270451	ENSG00000239264	TXNDC5	thioredoxin domain containing 5 (endoplasmic reticulum) (TXNDC5), transcript variant 1, mRNA	0.112839	0	Group 2	Yes
A_23_P84596	ENSG00000170476	MZB1	marginal zone B and B1 cell-specific protein (MZB1), mRNA	0.121228	0	Group 2	Yes
A_24_P144346	ENSG00000223931	RP11-1166P10.8	PREDICTED: hypothetical protein LOC100132941 (LOC100132941), mRNA	0.142216	0.469349	Group 2	Yes
A_23_P380240	ENSG00000124469	CEACAM8	carcinoembryonic antigen-related cell adhesion molecule 8 (CEACAM8), mRNA	0.145159	0.731741	Group 2	Yes
A_23_P101683	ENSG00000105205	CLC	Charcot-Leyden crystal protein (CLC), mRNA	0.150781	0.392114	Group 1	No
A_33_P3714341				0.156026	0.392114	Group 2	Yes
A_24_P402690	ENSG00000135916	ITM2C	integral membrane protein 2C (ITM2C), transcript variant 1, mRNA	0.166184	0.469349	Group 2	Yes
A_33_P3768930		BF175071	MYE4344 Myeloma (MYE) cDNA library cDNA, mRNA sequence	0.166422	0.392114	Group 2	Yes
A_33_P3376958		LOC96610	BMS1 homolog, ribosome assembly protein (yeast) pseudogene (LOC96610), non-coding RNA	0.177959	0.392114	Group 2	Yes
A_23_P37736	ENSG00000048462	TNFRSF17	tumor necrosis factor receptor superfamily, member 17 (TNFRSF17), mRNA	0.190229	0.731741	Group 2	Yes
A_24_P79403	ENSG00000163737	PF4	platelet factor 4 (PF4), mRNA	0.200004	0.660843	Group 1	No
A_21_P0011347		XLOC_l2_004840		0.207125	0.949157	Group 2	Yes
A_23_P72668	ENSG00000168497	SDPR	serum deprivation response (SDPR), mRNA	0.216296	0.949157	Group 1	No
A_33_P3247639	ENSG00000233732	IGHV3OR16-10	PREDICTED: hypothetical protein LOC100508797 (LOC100508797), mRNA	0.220277	0.731741	Group 2	Yes
A_23_P29124	ENSG00000203618	GP1BB	glycoprotein Ib (platelet), beta polypeptide (GP1BB), mRNA	0.22573	0.949157	Group 1	No
A_23_P111701	ENSG00000127920	GNG11	guanine nucleotide binding protein (G protein), gamma 11 (GNG11), mRNA	0.227779	0.731741	Group 1	No
A_23_P163567	ENSG00000103056	SMPD3	sphingomyelin phosphodiesterase 3, neutral membrane (neutral sphingomyelinase II) (SMPD3), mRNA	0.231521	0.731741	Group 1	Yes
A_23_P121596	ENSG00000163736	PPBP	pro-platelet basic protein (chemokine (C-X-C motif) ligand 7) (PPBP), mRNA	0.232754	0.949157	Group 1	No
A_23_P116264	ENSG00000154146	NRGN	neurogranin (protein kinase C substrate, RC3) (NRGN), transcript variant 1, mRNA	0.239025	0.731741	Group 1	No
A_23_P160159	ENSG00000142583	SLC2A5	solute carrier family 2 (facilitated glucose/fructose transporter), member 5 (SLC2A5), transcript variant 1, mRNA	0.239649	0.469349	Group 2	Yes
A_24_P228550	ENSG00000101162	TUBB1	tubulin, beta 1 class VI (TUBB1), mRNA	0.249964	0.949157	Group 1	No
A_23_P258769	ENSG00000223865	HLA-DPB1	major histocompatibility complex, class II, DP beta 1 (HLA-DPB1), mRNA	0.25375	0.392114	Group 1	No
A_32_P168349	ENSG00000204420	C6orf25	chromosome 6 open reading frame 25 (C6orf25), transcript variant 7, mRNA	0.256672	0.949157	Group 1	No
A_23_P312920	ENSG00000110777	POU2AF1	POU class 2 associating factor 1 (POU2AF1), mRNA	0.259635	0.660843	Group 2	Yes
A_33_P3256793	ENSG00000116299	KIAA1324	KIAA1324 (KIAA1324), mRNA	0.279562	0.469349	Group 1	No
A_23_P25121	ENSG00000134285	FKBP11	FK506 binding protein 11, 19 kDa (FKBP11), transcript variant 1, mRNA	0.280757	0.731741	Group 2	Yes
A_21_P0014546		LOC100288273	PREDICTED: hypothetical LOC100288273 (LOC100288273), miscRNA	0.282499	0.392114	Group 2	Yes
A_23_P32404	ENSG00000172183	ISG20	interferon stimulated exonuclease gene 20kDa (ISG20), mRNA	0.283665	0	Group 2	No
A_32_P351968	ENSG00000242574	HLA-DMB	major histocompatibility complex, class II, DM beta (HLA-DMB), mRNA	0.285699	0.392114	Group 1	No
A_23_P152838	ENSG00000271503	CCL5	chemokine (C-C motif) ligand 5 (CCL5), mRNA	0.287734	0.660843	Group 1	Yes
A_23_P165840	ENSG00000115758	ODC1	ornithine decarboxylase 1 (ODC1), mRNA	0.290454	0	Group 1	No
A_23_P167328	ENSG00000004468	CD38	CD38 molecule (CD38), mRNA	0.293222	0.949157	Group 2	Yes
A_32_P140139	ENSG00000124491	F13A1	coagulation factor XIII, A1 polypeptide (F13A1), mRNA	0.30021	0.731741	Group 1	No
A_23_P37375	ENSG00000100784	RPS6KA5	ribosomal protein S6 kinase, 90kDa, polypeptide 5 (RPS6KA5), transcript variant 1, mRNA	0.30736	0	Group 1	No
A_33_P3387991	ENSG00000092067	CEBPE	CCAAT/enhancer binding protein (C/EBP), epsilon (CEBPE), mRNA	0.314641	0.949157	Group 1	Yes
A_23_P48088	ENSG00000139193	CD27	CD27 molecule (CD27), mRNA	0.317558	0.731741	Group 1	No
A_23_P250302	ENSG00000183625	CCR3	chemokine (C-C motif) receptor 3 (CCR3), transcript variant 1, mRNA	0.326583	0.731741	Group 1	Yes
A_21_P0010087		XLOC_013531	BROAD Institute lincRNA (XLOC_013531), lincRNA	0.334187	0.731741	Group 1	No
A_23_P214360	ENSG00000137265	IRF4	interferon regulatory factor 4 (IRF4), transcript variant 1, mRNA	0.337676	0.731741	Group 2	No
A_24_P388528	ENSG00000073849	ST6GAL1	ST6 beta-galactosamide alpha-2,6-sialyltranferase 1 (ST6GAL1), transcript variant 1, mRNA	0.342178	0	Group 1	No
A_23_P2601	ENSG00000166598	HSP90B1	heat shock protein 90kDa beta (Grp94), member 1 (HSP90B1), mRNA	0.346318	0.731741	Group 1	No
A_23_P112531	ENSG00000167106	FAM102A	family with sequence similarity 102, member A (FAM102A), transcript variant 1, mRNA	0.348273	0.660843	Group 1	No
A_23_P30913	ENSG00000231389	HLA-DPA1	major histocompatibility complex, class II, DP alpha 1 (HLA-DPA1), transcript variant 1, mRNA	0.357848	0.469349	Group 1	No
A_33_P3260654	ENSG00000211772	TRBC2	T cell receptor beta constant 2	0.362429	0.731741	Group 1	Yes
A_33_P3237674	ENSG00000277734	TRAC	T cell receptor alpha constant	0.36376	0.469349	Group 1	Yes
A_23_P114299	ENSG00000186810	CXCR3	chemokine (C-X-C motif) receptor 3 (CXCR3), transcript variant 1, mRNA	0.364042	0.392114	Group 1	No
A_23_P154605	ENSG00000196562	SULF2	sulfatase 2 (SULF2), transcript variant 1, mRNA	0.365913	0.731741	Group 1	No
A_24_P68079	ENSG00000168016	TRANK1	tetratricopeptide repeat and ankyrin repeat containing 1 (TRANK1), mRNA	0.368835	0.392114	Group 1	No
A_33_P3250680	ENSG00000102245	CD40LG	CD40 ligand (CD40LG), mRNA	0.368924	0.731741	Group 1	Yes
A_24_P166443	ENSG00000230763	HLA-DPB1	major histocompatibility complex, class II, DP beta 1 (HLA-DPB1), mRNA	0.373511	0.469349	Group 1	No
A_24_P274831	ENSG00000179144	GIMAP7	GTPase, IMAP family member 7 (GIMAP7), mRNA	0.374095	0.949157	Group 1	No
A_24_P206047	ENSG00000151729	SLC25A4	solute carrier family 25 (mitochondrial carrier; adenine nucleotide translocator), member 4 (SLC25A4), nuclear gene encoding mitochondrial protein, mRNA	0.374557	0.949157	Group 2	No
A_21_P0011495	ENSG00000248472	DDX11L9	DEAD/H (Asp-Glu-Ala-Asp/His) box polypeptide 11 like 9 (DDX11L9), non-coding RNA	0.375872	0.731741	Group 1	No
A_33_P3291871	A_33_P3291871_PG1			0.377336	0.660843	Group 2	No
A_24_P252078	ENSG00000186470	BTN3A2	butyrophilin, subfamily 3, member A2 (BTN3A2), transcript variant 1, mRNA	0.380772	0.469349	Group 1	No
A_23_P88278	ENSG00000092200	RPGRIP1	retinitis pigmentosa GTPase regulator interacting protein 1 (RPGRIP1), mRNA	0.384161	0.392114	Group 1	No
A_23_P56703	ENSG00000186854	C2orf89	chromosome 2 open reading frame 89 (C2orf89), mRNA	0.39081	0.731741	Group 1	No
A_33_P3330039	ENSG00000023902	PLEKHO1	pleckstrin homology domain containing, family O member 1 (PLEKHO1), mRNA	0.391569	0.392114	Group 1	No
A_23_P407565	ENSG00000168329	CX3CR1	chemokine (C-X3-C motif) receptor 1 (CX3CR1), transcript variant 4, mRNA	0.392038	0.469349	Group 1	No
A_33_P3363637	ENSG00000095585	BLNK	B-cell linker (BLNK), transcript variant 1, mRNA	0.39404	0.949157	Group 2	No
A_33_P3387691	ENSG00000146285	SCML4	sex comb on midleg-like 4 (Drosophila) (SCML4), mRNA	0.399518	0.469349	Group 1	No
A_23_P159335	ENSG00000172116	CD8B	CD8b molecule (CD8B), transcript variant 5, mRNA	0.402382	0.731741	Group 1	Yes
A_32_P87697	ENSG00000204287	HLA-DRA	major histocompatibility complex, class II, DR alpha (HLA-DRA), mRNA	0.403635	0.660843	Group 1	No
A_32_P356316	ENSG00000204252	HLA-DOA	major histocompatibility complex, class II, DO alpha (HLA-DOA), mRNA	0.405468	0.949157	Group 1	No
A_23_P42588	ENSG00000196329	GIMAP5	GTPase, IMAP family member 5 (GIMAP5), mRNA	0.410045	0.949157	Group 1	No
A_33_P3368014	ENSG00000122986	HVCN1	hydrogen voltage-gated channel 1 (HVCN1), transcript variant 1, mRNA	0.412407	0	Group 1	No
A_23_P145024	ENSG00000169252	ADRB2	adrenergic, beta-2-, receptor, surface (ADRB2), mRNA	0.415125	0.469349	Group 1	No
A_23_P153372	ENSG00000196684	HSH2D	hematopoietic SH2 domain containing (HSH2D), mRNA	0.41718	0	Group 1	No
A_23_P163467	ENSG00000188549	C15orf52	chromosome 15 open reading frame 52 (C15orf52), mRNA	0.420608	0.731741	Group 1	No
A_24_P354724	ENSG00000164691	TAGAP	T-cell activation RhoGTPase activating protein (TAGAP), transcript variant 2, mRNA	0.420848	0	Group 1	No
A_33_P3244274	ENSG00000212864	RNF208	ring finger protein 208, mRNA (cDNA clone MGC:21544 IMAGE:4151712), complete cds.	0.42653	0.949157	Group 1	No
A_24_P12413	ENSG00000065308	TRAM2	translocation associated membrane protein 2 (TRAM2), mRNA	0.429155	0.731741	Group 2	No
A_24_P124624	ENSG00000173391	OLR1	oxidized low density lipoprotein (lectin-like) receptor 1 (OLR1), transcript variant 1, mRNA	0.429331	0.949157	Group 2	Yes
A_32_P224522	ENSG00000125648	SLC25A23	solute carrier family 25 (mitochondrial carrier; phosphate carrier), member 23 (SLC25A23), nuclear gene encoding mitochondrial protein, mRNA	0.431838	0.392114	Group 1	No
A_33_P3214948	ENSG00000107742	SPOCK2	sparc/osteonectin, cwcv and kazal-like domains proteoglycan (testican) 2 (SPOCK2), transcript variant 2, mRNA	0.432013	0.949157	Group 1	No
A_23_P406385	ENSG00000127585	FBXL16	F-box and leucine-rich repeat protein 16 (FBXL16), mRNA	0.43303	0.949157	Group 1	No
A_33_P3336113	ENSG00000173825	TIGD3	tigger transposable element derived 3 (TIGD3), mRNA	0.433446	0.660843	Group 1	No
A_33_P3331491		LOC728392	uncharacterized protein LOC728392 (LOC728392), mRNA	0.438256	0.731741	Group 1	No
A_23_P200976	ENSG00000178922	HYI	hydroxypyruvate isomerase (putative) (HYI), transcript variant 3, mRNA	0.439984	0.660843	Group 2	No
A_33_P3373203		AK126778	cDNA FLJ44826 fis, clone BRACE3046762.	0.441068	0.731741	Group 1	No
A_33_P3221999	ENSG00000073605	GSDMB	gasdermin B (GSDMB), transcript variant 3, mRNA	0.442503	0	Group 1	No
A_23_P401076	ENSG00000157303	SUSD3	sushi domain containing 3 (SUSD3), mRNA	0.443035	0.660843	Group 1	No
A_23_P19673	ENSG00000118515	SGK1	serum/glucocorticoid regulated kinase 1 (SGK1), transcript variant 1, mRNA	0.444439	0.949157	Group 1	No
A_23_P1962	ENSG00000133321	RARRES3	retinoic acid receptor responder (tazarotene induced) 3 (RARRES3), mRNA	0.446761	0.949157	Group 1	No
A_23_P438	ENSG00000122188	LAX1	lymphocyte transmembrane adaptor 1 (LAX1), transcript variant 1, mRNA	0.446851	0.731741	Group 1	No
A_33_P3360675	ENSG00000188191	PRKAR1B	protein kinase, cAMP-dependent, regulatory, type I, beta (PRKAR1B), transcript variant 1, mRNA	0.447719	0.392114	Group 1	No
A_24_P312325	ENSG00000254936	C8ORF15	mRNA for hypothetical protein (C8ORF15).	0.448597	0.660843	Group 1	No
A_32_P216548	ENSG00000157978	LDLRAP1	low density lipoprotein receptor adaptor protein 1 (LDLRAP1), mRNA	0.451699	0.949157	Group 1	No
A_23_P6293	ENSG00000160185	UBASH3A	ubiquitin associated and SH3 domain containing A (UBASH3A), transcript variant 1, mRNA	0.453684	0.660843	Group 1	No
A_23_P29384	ENSG00000196653	ZNF502	zinc finger protein 502 (ZNF502), transcript variant 1, mRNA	0.455995	0.949157	Group 1	No
A_23_P140427	ENSG00000196405	EVL	Enah/Vasp-like (EVL), mRNA	0.458548	0.660843	Group 1	No
A_23_P259141	ENSG00000124256	ZBP1	Z-DNA binding protein 1 (ZBP1), transcript variant 1, mRNA	0.459019	0.392114	Group 2	No
A_23_P126844	ENSG00000215788	TNFRSF25	tumor necrosis factor receptor superfamily, member 25 (TNFRSF25), transcript variant 1, mRNA	0.461294	0.731741	Group 1	No
A_23_P161076	ENSG00000116824	CD2	CD2 molecule (CD2), mRNA	0.464018	0.949157	Group 1	Yes
A_33_P3210278	ENSG00000054654	SYNE2	spectrin repeat containing, nuclear envelope 2 (SYNE2), transcript variant 5, mRNA	0.465567	0	Group 1	No
A_23_P42306	ENSG00000204257	HLA-DMA	major histocompatibility complex, class II, DM alpha (HLA-DMA), mRNA	0.468362	0.949157	Group 1	No
A_24_P209455	ENSG00000133574	GIMAP4	GTPase, IMAP family member 4 (GIMAP4), mRNA	0.468828	0.469349	Group 1	No
A_33_P3252359	ENSG00000161267	BDH1	3-hydroxybutyrate dehydrogenase, type 1 (BDH1), nuclear gene encoding mitochondrial protein, transcript variant 3, mRNA	0.469168	0.392114	Group 1	No
A_32_P11894	ENSG00000130921	C12orf65	chromosome 12 open reading frame 65 (C12orf65), transcript variant 1, mRNA	0.472671	0.949157	Group 1	No
A_23_P205738	ENSG00000127152	BCL11B	B-cell CLL/lymphoma 11B (zinc finger protein) (BCL11B), transcript variant 1, mRNA	0.473285	0.949157	Group 1	No
A_23_P122439	ENSG00000124508	BTN2A2	butyrophilin, subfamily 2, member A2 (BTN2A2), transcript variant 2, mRNA	0.473514	0	Group 1	No
A_19_P00810361		AF239727		0.473783	0.469349	Group 2	No
A_23_P21057	ENSG00000180096	SEPT1	septin 1 (SEPT1), mRNA	0.475005	0.660843	Group 1	No
A_24_P10137	ENSG00000102760	RGCC	chromosome regulator of cell cycle	0.479184	0.731741	Group 1	No
A_23_P252155	ENSG00000165209	STRBP	spermatid perinuclear RNA binding protein (STRBP), transcript variant 1, mRNA	0.481554	0.731741	Group 2	No
A_23_P70095	ENSG00000019582	CD74	CD74 molecule, major histocompatibility complex, class II invariant chain (CD74), transcript variant 3, mRNA	0.482116	0.731741	Group 1	No
A_24_P329065	ENSG00000026950	BTN3A1	butyrophilin, subfamily 3, member A1 (BTN3A1), transcript variant 1, mRNA	0.482727	0.660843	Group 1	No
A_23_P149992	ENSG00000107438	PDLIM1	PDZ and LIM domain 1 (PDLIM1), mRNA	0.483962	0.949157	Group 2	No
A_33_P3261648	ENSG00000196912	ANKRD36B	ankyrin repeat domain 36B (ANKRD36B), mRNA	0.486536	0.469349	Group 1	No
A_23_P339954	ENSG00000196993	NPIPB9	nuclear pore complex interacting protein family, member B9 (NPIPB9), transcript variant 2, mRNA	0.488016	0.392114	Group 1	No
A_32_P14850	ENSG00000196436	NPIPL2	nuclear pore complex interacting protein-like 2	0.489026	0.392114	Group 1	No
A_23_P85240	ENSG00000196664	TLR7	toll-like receptor 7 (TLR7), mRNA	0.489522	0.660843	Group 1	No
A_23_P93690	ENSG00000166508	MCM7	minichromosome maintenance complex component 7 (MCM7), transcript variant 2, mRNA	0.492901	0.731741	Group 2	No
A_23_P203920	ENSG00000123096	SSPN	sarcospan (Kras oncogene-associated gene) (SSPN), transcript variant 1, mRNA	0.494213	0.949157	Group 2	No
A_33_P3262515	ENSG00000185989	RASA3	RAS p21 protein activator 3 (RASA3), mRNA	0.495252	0.392114	Group 1	No
A_24_P188941	ENSG00000181163	NPM1	nucleophosmin (nucleolar phosphoprotein B23, numatrin) (NPM1), transcript variant 1, mRNA	0.495297	0.660843	Group 1	No
A_23_P77066	ENSG00000128739	SNRPN	small nuclear ribonucleoprotein polypeptide N (SNRPN), transcript variant 4, mRNA	0.495334	0.660843	Group 1	No
A_23_P406105	ENSG00000089154	GCN1L1	GCN1 general control of amino-acid synthesis 1-like 1 (yeast) (GCN1L1), mRNA	0.497443	0.392114	Group 1	No
A_33_P3400943	ENSG00000089486	C16orf5	chromosome 16 open reading frame 5 (C16orf5), transcript variant 1, mRNA	0.498007	0.731741	Group 1	No
A_21_P0013050		LOC100505903	PREDICTED: hypothetical LOC100505903 (LOC100505903), miscRNA	2.00251	0	Group 3	No
A_33_P3879161	ENSG00000155629	PIK3AP1	phosphoinositide-3-kinase adaptor protein 1 (PIK3AP1), mRNA	2.00594	0.949157	Group 3	No
A_33_P3411945	ENSG00000214212	C19orf38	chromosome 19 open reading frame 38 (C19orf38), mRNA	2.01398	0.949157	Group 3	No
A_21_P0009192		XLOC_012505	AGENCOURT_6545271 NIH_MGC_88 cDNA clone IMAGE:5738611 5', mRNA sequence	2.01438	0.469349	Group 3	No
A_33_P3322283	ENSG00000163512	AZI2	5-azacytidine induced 2 (AZI2), transcript variant 1, mRNA	2.01778	0.316092	Group 3	No
A_24_P363548	ENSG00000127946	HIP1	huntingtin interacting protein 1 (HIP1), transcript variant 1, mRNA	2.02169	0.660843	Group 3	No
A_33_P3236077	ENSG00000249581	CLRN2	clarin 2 (CLRN2), mRNA	2.02356	0	Group 3	No
A_33_P3365077	ENSG00000177489	OR2G2	olfactory receptor, family 2, subfamily G, member 2 (OR2G2), mRNA	2.02541	0.731741	Group 3	No
A_33_P3342957	ENSG00000081320	STK17B	serine/threonine kinase 17b (STK17B), mRNA	2.02836	0	Group 3	No
A_23_P62115	ENSG00000102265	TIMP1	TIMP metallopeptidase inhibitor 1 (TIMP1), mRNA	2.03159	0.949157	Group 3	No
A_21_P0001902		XLOC_001625	PREDICTED: hypothetical LOC100507286 (LOC100507286), miscRNA	2.03383	0.469349	Group 3	No
A_23_P203665	ENSG00000078124	ACER3	alkaline ceramidase 3 (ACER3), mRNA	2.03836	0.660843	Group 3	No
A_33_P3220390	ENSG00000146457	WTAP	Wilms tumor 1 associated protein, mRNA (cDNA clone IMAGE:5399821), partial cds.	2.03841	0.660843	Group 3	No
A_24_P3005	ENSG00000169432	SCN9A	sodium channel, voltage-gated, type IX, alpha subunit (SCN9A), mRNA	2.04124	0.469349	Group 3	No
A_24_P398092	ENSG00000119318	RAD23B	RAD23 homolog B (S. cerevisiae) (RAD23B), transcript variant 1, mRNA	2.04257	0.949157	Group 3	No
A_23_P10182	ENSG00000168306	ACOX2	acyl-CoA oxidase 2, branched chain (ACOX2), mRNA	2.04593	0.316092	Group 3	No
A_23_P390734	ENSG00000111790	FGFR1OP2	FGFR1 oncogene partner 2 (FGFR1OP2), transcript variant 1, mRNA	2.0466	0.316092	Group 3	No
A_33_P3350726	ENSG00000132170	PPARG	peroxisome proliferator-activated receptor gamma (PPARG), transcript variant 3, mRNA	2.05015	0.469349	Group 3	No
A_32_P19840		LOC100507507	PREDICTED: hypothetical LOC100507507 (LOC100507507), miscRNA	2.05625	0.660843	Group 3	No
A_23_P405873	ENSG00000147894	C9orf72	chromosome 9 open reading frame 72 (C9orf72), transcript variant 2, mRNA	2.06066	0.949157	Group 3	No
A_33_P3337627	ENSG00000137672	TRPC6	transient receptor potential cation channel, subfamily C, member 6 (TRPC6), mRNA	2.06123	0.660843	Group 3	No
A_33_P3234571	ENSG00000034152	MAP2K3	mitogen-activated protein kinase kinase 3 (MAP2K3), transcript variant B, mRNA	2.06181	0.660843	Group 3	No
A_33_P3361746	ENSG00000104447	TRPS1	trichorhinophalangeal syndrome I (TRPS1), mRNA	2.06787	0.316092	Group 3	No
A_33_P3370555	ENSG00000054983	GALC	galactosylceramidase	2.07143	0.316092	Group 3	No
A_23_P47565	ENSG00000134333	LDHA	lactate dehydrogenase A (LDHA), transcript variant 1, mRNA	2.07637	0.731741	Group 3	No
A_23_P19226	ENSG00000111817	DSE	dermatan sulfate epimerase (DSE), transcript variant 1, mRNA	2.07728	0.949157	Group 3	No
A_23_P168828	ENSG00000155090	KLF10	Kruppel-like factor 10 (KLF10), transcript variant 1, mRNA	2.09071	0.949157	Group 3	No
A_23_P432626	ENSG00000075303	SLC25A40	solute carrier family 25, member 40 (SLC25A40), nuclear gene encoding mitochondrial protein, mRNA	2.09197	0	Group 3	No
A_23_P254254	ENSG00000181523	SGSH	N-sulfoglucosamine sulfohydrolase (SGSH), mRNA	2.09512	0.660843	Group 3	No
A_32_P235159	ENSG00000224287	MSL3P1	male-specific lethal 3 homolog (Drosophila) pseudogene 1 (MSL3P1), non-coding RNA	2.09969	0.949157	Group 3	No
A_24_P304051	ENSG00000148834	GSTO1	glutathione S-transferase omega 1 (GSTO1), transcript variant 1, mRNA	2.10151	0.316092	Group 3	No
A_23_P63026	ENSG00000116977	LGALS8	lectin, galactoside-binding, soluble, 8 (LGALS8), transcript variant 1, mRNA	2.10318	0.469349	Group 3	No
A_24_P58037	ENSG00000231909	MAP1LC3BP1	PREDICTED: microtubule-associated proteins 1A/1B light chain 3B-like (LOC392288), mRNA	2.10344	0.660843	Group 3	No
A_21_P0002262		XLOC_001596	BROAD Institute lincRNA (XLOC_001596), lincRNA	2.1072	0.469349	Group 3	No
A_23_P133438	ENSG00000145569	FAM105A	family with sequence similarity 105, member A (FAM105A), mRNA	2.11085	0	Group 3	No
A_21_P0011831		XLOC_l2_007456	BROAD Institute lincRNA (XLOC_l2_007456), lincRNA	2.11179	0.660843	Group 3	No
A_19_P00810557	ENSG00000124831	LRRFIP1	leucine rich repeat (in FLII) interacting protein 1 (LRRFIP1), transcript variant 1, mRNA	2.11685	0.660843	Group 3	No
A_23_P74799	ENSG00000085491	SLC25A24	solute carrier family 25 (mitochondrial carrier; phosphate carrier), member 24 (SLC25A24), nuclear gene encoding mitochondrial protein, transcript variant 2, mRNA	2.11886	0.469349	Group 3	No
A_33_P3379046	Hs.591612	LOC729770	PREDICTED: hypothetical LOC729770 (LOC729770), miscRNA	2.12064	0.316092	Group 3	No
A_32_P60459	ENSG00000165312	OTUD1	OTU domain containing 1 (OTUD1), mRNA	2.12556	0	Group 3	No
A_33_P3383871	ENSG00000145780	FEM1C	fem-1 homolog c (C. elegans) (FEM1C), mRNA	2.13088	0.660843	Group 3	No
A_24_P112447	ENSG00000198018	ENTPD7	ectonucleoside triphosphate diphosphohydrolase 7 (ENTPD7), mRNA	2.13457	0	Group 3	No
A_24_P943113	ENSG00000163412	EIF4E3	eukaryotic translation initiation factor 4E family member 3 (EIF4E3), transcript variant 2, mRNA	2.1435	0.469349	Group 3	No
A_33_P3353520		LOC646862	uncharacterized protein LOC646862 (LOC646862), mRNA	2.14647	0.660843	Group 3	No
A_23_P200507	ENSG00000143771	CNIH4	cornichon homolog 4 (Drosophila) (CNIH4), mRNA	2.15067	0.660843	Group 3	No
A_23_P101707	ENSG00000105355	PLIN3	perilipin 3 (PLIN3), transcript variant 1, mRNA	2.15265	0.731741	Group 3	No
A_33_P3333523	A_33_P3333523			2.15287	0.469349	Group 3	Yes
A_23_P163380	ENSG00000136371	MTHFS	5,10-methenyltetrahydrofolate synthetase (5-formyltetrahydrofolate cyclo-ligase) (MTHFS), transcript variant 1, mRNA	2.15486	0.469349	Group 3	No
A_23_P105028	ENSG00000184743	ATL3	atlastin GTPase 3 (ATL3), mRNA	2.15565	0	Group 3	No
A_23_P48596	ENSG00000129538	RNASE1	ribonuclease, RNase A family, 1 (pancreatic) (RNASE1), transcript variant 3, mRNA	2.16162	0.949157	Group 3	No
A_24_P303480	ENSG00000118508	RAB32	RAB32, member RAS oncogene family (RAB32), mRNA	2.16863	0.469349	Group 3	No
A_33_P3326588	ENSG00000173530	TNFRSF10D	tumor necrosis factor receptor superfamily, member 10d, decoy with truncated death domain (TNFRSF10D), mRNA	2.17435	0.731741	Group 3	No
A_24_P655458	ENSG00000188056	TREML4	triggering receptor expressed on myeloid cells-like 4 (TREML4), mRNA	2.18767	0.731741	Group 3	No
A_23_P258393	ENSG00000164088	PPM1M	protein phosphatase, Mg2+/Mn2+ dependent, 1M (PPM1M), transcript variant 1, mRNA	2.19529	0.731741	Group 3	No
A_32_P65616	ENSG00000172179	PRL	prolactin (PRL), transcript variant 1, mRNA	2.20299	0.316092	Group 3	No
A_21_P0012676	ENSG00000137100	GK3P	glycerol kinase 3 pseudogene (GK3P), non-coding RNA	2.20375	0.949157	Group 3	No
A_33_P3281323	ENSG00000196363	WDR5	WDR5_HUMAN (P61964) WD-repeat protein 5 (BMP2-induced 3-kb gene protein), partial (16%)	2.20465	0.316092	Group 3	No
A_24_P347378	ENSG00000132965	ALOX5AP	arachidonate 5-lipoxygenase-activating protein (ALOX5AP), transcript variant 1, mRNA	2.20838	0.731741	Group 3	No
A_24_P149036	ENSG00000113657	DPYSL3	dihydropyrimidinase-like 3 (DPYSL3), transcript variant 2, mRNA	2.20982	0	Group 3	No
A_21_P0005823		XLOC_007062	BROAD Institute lincRNA (XLOC_007062), lincRNA	2.2101	0.316092	Group 3	No
A_33_P3343155	ENSG00000156052	GNAQ	guanine nucleotide binding protein (G protein), q polypeptide (GNAQ), mRNA	2.21092	0.316092	Group 3	No
A_23_P143526	ENSG00000160307	S100B	S100 calcium binding protein B (S100B), mRNA	2.21256	0.731741	Group 3	No
A_33_P3522525	ENSG00000109519	GRPEL1	GrpE-like 1, mitochondrial (E. coli) (GRPEL1), nuclear gene encoding mitochondrial protein, mRNA	2.21538	0.731741	Group 3	No
A_33_P3348744	A_33_P3348744			2.21815	0.660843	Group 3	No
A_32_P220715	ENSG00000171471	MAP1LC3B	microtubule-associated protein 1 light chain 3 beta (MAP1LC3B), mRNA	2.22623	0.949157	Group 3	No
A_33_P3783235	Hs.100691	LOC286052	cDNA FLJ37785 fis, clone BRHIP2028330.	2.2263	0.316092	Group 3	No
A_23_P154986	ENSG00000100031	GGT1	gamma-glutamyltransferase 1 (GGT1), transcript variant 1, mRNA	2.23051	0	Group 3	No
A_23_P91140	ENSG00000115425	PECR	peroxisomal trans-2-enoyl-CoA reductase (PECR), mRNA	2.23353	0	Group 3	No
A_32_P228775	ENSG00000163605	PPP4R2	protein phosphatase 4, regulatory subunit 2 (PPP4R2), mRNA	2.23892	0.316092	Group 3	No
A_33_P3253144	ENSG00000146094	DOK3	docking protein 3 (DOK3), transcript variant 1, mRNA	2.23905	0.949157	Group 3	No
A_33_P3211804	ENSG00000159216	RUNX1	runt-related transcription factor 1 (RUNX1), transcript variant 2, mRNA	2.2422	0.469349	Group 3	No
A_21_P0012781		XLOC_l2_011204	BX104493 Soares fetal liver spleen 1NFLS cDNA clone IMAGp998E24531, mRNA sequence	2.24307	0	Group 3	No
A_23_P143016	ENSG00000196843	ARID5A	AT rich interactive domain 5A (MRF1-like) (ARID5A), mRNA	2.24384	0.731741	Group 3	No
A_21_P0000644	Hs.579378	LOC400655	uncharacterized LOC400655 (LOC400655), non-coding RNA	2.24945	0.731741	Group 3	No
A_24_P418408	ENSG00000182118	FAM89A	family with sequence similarity 89, member A (FAM89A), mRNA	2.25634	0.660843	Group 3	No
A_33_P3287078	ENSG00000125812	GZF1	GDNF-inducible zinc finger protein 1 (GZF1), mRNA	2.26425	0.949157	Group 3	No
A_33_P3408953	ENSG00000276160	GGTLC2	gamma-glutamyltransferase light chain 2 (GGTLC2), transcript variant 1, mRNA	2.26661	0.660843	Group 3	No
A_24_P154037	ENSG00000185950	IRS2	insulin receptor substrate 2 (IRS2), mRNA	2.27673	0.660843	Group 3	No
A_23_P320021	ENSG00000112041	TULP1	tubby like protein 1 (TULP1), mRNA	2.28213	0	Group 3	No
A_33_P3334185	ENSG00000135049	AGTPBP1	ATP/GTP binding protein 1 (AGTPBP1), mRNA	2.28278	0.316092	Group 3	No
A_33_P3339696		A_33_P3339696		2.28607	0.949157	Group 3	No
A_23_P353035	ENSG00000163453	IGFBP7	insulin-like growth factor binding protein 7 (IGFBP7), mRNA	2.28899	0.316092	Group 3	No
A_24_P22050	ENSG00000139832	RAB20	RAB20, member RAS oncogene family (RAB20), mRNA	2.29319	0.949157	Group 3	No
A_33_P3251148	ENSG00000100300	TSPO	translocator protein (18kDa) (TSPO), transcript variant PBR, mRNA	2.29726	0.731741	Group 3	Yes
A_24_P286114	ENSG00000079215	SLC1A3	solute carrier family 1 (glial high affinity glutamate transporter), member 3 (SLC1A3), transcript variant 1, mRNA	2.30409	0.660843	Group 3	No
A_33_P3213311	A_33_P3213311			2.3089	0	Group 3	No
A_23_P12463	ENSG00000116260	QSOX1	quiescin Q6 sulfhydryl oxidase 1 (QSOX1), transcript variant 1, mRNA	2.31591	0.731741	Group 3	Yes
A_23_P41424	ENSG00000138821	SLC39A8	solute carrier family 39 (zinc transporter), member 8 (SLC39A8), transcript variant 1, mRNA	2.31609	0	Group 3	No
A_23_P412562	ENSG00000143110	C1orf162	chromosome 1 open reading frame 162 (C1orf162), mRNA	2.32848	0	Group 3	No
A_23_P73837	ENSG00000101916	TLR8	toll-like receptor 8 (TLR8), mRNA	2.32999	0.949157	Group 3	No
A_33_P3401753	ENSG00000185897	FFAR3	free fatty acid receptor 3 (FFAR3), mRNA	2.33818	0.949157	Group 3	No
A_23_P166459	ENSG00000100097	LGALS1	lectin, galactoside-binding, soluble, 1 (LGALS1), mRNA	2.34838	0.731741	Group 3	No
A_21_P0000590	ENSG00000006451	ZEB2	zinc finger E-box binding homeobox 2 (ZEB2), transcript variant 3, non-coding RNA	2.35181	0	Group 3	No
A_33_P3271490	ENSG00000153250	RBMS1	RNA binding motif, single stranded interacting protein 1 (RBMS1), transcript variant 1, mRNA	2.3557	0	Group 3	No
A_21_P0012398		XLOC_l2_009888	BROAD Institute lincRNA (XLOC_l2_009888), lincRNA	2.35926	0	Group 3	No
A_23_P334864	ENSG00000155744	FAM126B	family with sequence similarity 126, member B (FAM126B), mRNA	2.36793	0.731741	Group 3	No
A_33_P3402086	ENSG00000153208	MERTK	c-mer proto-oncogene tyrosine kinase	2.36843	0.469349	Group 3	No
A_21_P0009323		XLOC_012467	BROAD Institute lincRNA (XLOC_012467), lincRNA	2.36876	0.469349	Group 3	No
A_21_P0007400		XLOC_009554	DKFZp686O0397_r1 686 (synonym: hlcc3) cDNA clone DKFZp686O0397 5', mRNA sequence	2.38104	0.316092	Group 3	No
A_33_P3248749	ENSG00000172426	RSPH9	radial spoke head 9 homolog (Chlamydomonas)	2.4133	0	Group 3	No
A_33_P3278916	ENSG00000129292	PHF20L1	PHD finger protein 20-like 1	2.41404	0	Group 3	No
A_33_P3342528	ENSG00000169860	P2RY1	purinergic receptor P2Y, G-protein coupled, 1 (P2RY1), mRNA	2.41517	0	Group 3	No
A_32_P52785	ENSG00000146122	DAAM2	dishevelled associated activator of morphogenesis 2 (DAAM2), transcript variant 2, mRNA	2.4206	0.469349	Group 3	No
A_19_P00315524	ENSG00000225783	MIAT	myocardial infarction associated transcript (non-protein coding) (MIAT), transcript variant 1, non-coding RNA	2.43155	0.731741	Group 3	No
A_24_P270144	ENSG00000135404	CD63	CD63 molecule (CD63), transcript variant 2, mRNA	2.43296	0.316092	Group 3	No
A_33_P3419545	ENSG00000102543	CDADC1	cytidine and dCMP deaminase domain containing 1 (CDADC1), transcript variant 2, mRNA	2.43714	0.660843	Group 3	No
A_24_P29723	ENSG00000127948	POR	P450 (cytochrome) oxidoreductase (POR), mRNA	2.45357	0.660843	Group 3	No
A_23_P67980	ENSG00000118263	KLF7	Kruppel-like factor 7 (ubiquitous) (KLF7), mRNA	2.48594	0.660843	Group 3	No
A_32_P212373	ENSG00000233461	ENST00000425412	RP11-295G20, novel antisense RNA	2.52126	0.660843	Group 3	No
A_33_P3538279		PRO2852	clone FLC0578 PRO2852 mRNA, complete cds.	2.52207	0.469349	Group 3	No
A_23_P212522	ENSG00000058063	ATP11B	ATPase, class VI, type 11B (ATP11B), mRNA	2.54111	0	Group 3	No
A_33_P3303742	ENSG00000239642	AC034228.7	acyl-CoA synthetase long-chain family member 6	2.54386	0	Group 3	No
A_21_P0001238		XLOC_001257		2.54448	0.731741	Group 3	Yes
A_33_P3276713	ENSG00000019991	HGF	hepatocyte growth factor (hepapoietin A; scatter factor) (HGF), transcript variant 2, mRNA	2.54673	0	Group 3	No
A_33_P3351371	ENSG00000137869	CYP19A1	cytochrome P450, family 19, subfamily A, polypeptide 1 (CYP19A1), transcript variant 2, mRNA	2.5482	0	Group 3	No
A_23_P427299		DQ786249	clone HLS_IMAGE_234376 mRNA sequence.	2.55373	0.731741	Group 3	No
A_23_P207445	ENSG00000108984	MAP2K6	mitogen-activated protein kinase kinase 6 (MAP2K6), mRNA	2.55808	0	Group 3	No
A_23_P348121	ENSG00000075426	FOSL2	FOS-like antigen 2 (FOSL2), mRNA	2.56299	0.949157	Group 3	No
A_21_P0012336	ENSG00000149435	GGTLC1	gamma-glutamyltransferase light chain 1 (GGTLC1), transcript variant A, mRNA	2.57365	0.316092	Group 3	No
A_23_P38795	ENSG00000171051	FPR1	formyl peptide receptor 1 (FPR1), transcript variant 2, mRNA	2.58436	0.949157	Group 3	No
A_24_P103886	ENSG00000067064	IDI1	isopentenyl-diphosphate delta isomerase 1 (IDI1), mRNA	2.60601	0	Group 3	No
A_24_P406060	ENSG00000137393	RNF144B	ring finger protein 144B (RNF144B), mRNA	2.61946	0.660843	Group 3	No
A_21_P0000856		LOC100288432	uncharacterized LOC100288432 (LOC100288432), non-coding RNA	2.63074	0.469349	Group 3	No
A_23_P316960	ENSG00000178719	GRINA	glutamate receptor, ionotropic, N-methyl D-aspartate-associated protein 1 (glutamate binding) (GRINA), transcript variant 1, mRNA	2.63298	0.469349	Group 3	No
A_33_P3251796	ENSG00000148459	PDSS1	prenyl (decaprenyl) diphosphate synthase, subunit 1 (PDSS1), mRNA	2.63665	0	Group 3	No
A_23_P145957	ENSG00000196511	TPK1	thiamin pyrophosphokinase 1 (TPK1), transcript variant 1, mRNA	2.64523	0	Group 3	No
A_23_P371039	ENSG00000101188	NTSR1	neurotensin receptor 1 (high affinity) (NTSR1), mRNA	2.65182	0.316092	Group 3	No
A_23_P380614	ENSG00000054793	ATP9A	ATPase, class II, type 9A (ATP9A), mRNA	2.65828	0.660843	Group 3	No
A_23_P160849	ENSG00000158869	FCER1G	Fc fragment of IgE, high affinity I, receptor for; gamma polypeptide (FCER1G), mRNA	2.67167	0.660843	Group 3	No
A_33_P3396389	ENSG00000115594	IL1R1	interleukin 1 receptor, type I (IL1R1), mRNA	2.68066	0.731741	Group 3	No
A_23_P120883	ENSG00000100292	HMOX1	heme oxygenase (decycling) 1 (HMOX1), mRNA	2.68351	0.316092	Group 3	No
A_23_P105002	ENSG00000149489	ROM1	retinal outer segment membrane protein 1 (ROM1), mRNA	2.68979	0	Group 3	No
A_23_P137470	ENSG00000116991	SIPA1L2	signal-induced proliferation-associated 1 like 2 (SIPA1L2), mRNA	2.7091	0.660843	Group 3	No
A_33_P3231277	ENSG00000100644	HIF1A	hypoxia inducible factor 1, alpha subunit (basic helix-loop-helix transcription factor) (HIF1A), transcript variant 2, mRNA	2.72121	0.316092	Group 3	No
A_24_P170439	ENSG00000184106	TREML3	triggering receptor expressed on myeloid cells-like 3 (TREML3), non-coding RNA	2.77344	0.949157	Group 3	No
A_24_P64653	ENSG00000170439	METTL7B	methyltransferase like 7B (METTL7B), mRNA	2.79339	0	Group 3	No
A_23_P168556	ENSG00000106089	STX1A	syntaxin 1A (brain) (STX1A), transcript variant 1, mRNA	2.79515	0.949157	Group 3	No
A_24_P314179	ENSG00000157557	ETS2	v-ets erythroblastosis virus E26 oncogene homolog 2 (avian) (ETS2), mRNA	2.7992	0.949157	Group 3	No
A_23_P217564	ENSG00000068366	ACSL4	acyl-CoA synthetase long-chain family member 4 (ACSL4), transcript variant 1, mRNA	2.815	0.316092	Group 3	No
A_24_P244944	ENSG00000140563	MCTP2	multiple C2 domains, transmembrane 2 (MCTP2), transcript variant 1, mRNA	2.81979	0.731741	Group 3	No
A_33_P3271594	ENSG00000138100	TRIM54	tripartite motif containing 54 (TRIM54), transcript variant 1, mRNA	2.82702	0	Group 3	No
A_23_P151710	ENSG00000125384	PTGER2	prostaglandin E receptor 2 (subtype EP2), 53kDa (PTGER2), mRNA	2.83895	0	Group 3	No
A_24_P188377	ENSG00000196352	CD55	CD55 molecule, decay accelerating factor for complement (Cromer blood group) (CD55), transcript variant 1, mRNA	2.86117	0.731741	Group 3	No
A_23_P166306	ENSG00000160200	CBS	cystathionine-beta-synthase (CBS), transcript variant 1, mRNA	2.89988	0.949157	Group 3	No
A_33_P3329255	ENSG00000166507	NDST2	N-deacetylase/N-sulfotransferase (heparan glucosaminyl) 2, mRNA (cDNA clone IMAGE:4665687)	2.90439	0	Group 3	No
A_33_P3422787	ENSG00000241313	WWTR1-AS1	WWTR1 antisense RNA 1 (non-protein coding)	2.91475	0	Group 3	No
A_24_P52004	ENSG00000121892	PDS5A	PDS5, regulator of cohesion maintenance, homolog A (S. cerevisiae) (PDS5A), transcript variant 1, mRNA	2.95462	0.316092	Group 3	Yes
A_33_P3238997	ENSG00000173744	AGFG1	ArfGAP with FG repeats 1 (AGFG1), transcript variant 1, mRNA	2.9573	0	Group 3	No
A_23_P306941	ENSG00000159496	RGL4	ral guanine nucleotide dissociation stimulator-like 4 (RGL4), mRNA	2.95921	0.949157	Group 3	Yes
A_23_P143845	ENSG00000163659	TIPARP	TCDD-inducible poly(ADP-ribose) polymerase (TIPARP), transcript variant 2, mRNA	2.96658	0	Group 3	No
A_23_P99253	ENSG00000111052	LIN7A	lin-7 homolog A (C. elegans) (LIN7A), mRNA	2.97877	0.469349	Group 3	No
A_21_P0005438		XLOC_006277	BROAD Institute lincRNA (XLOC_006277), lincRNA	2.99149	0.949157	Group 3	Yes
A_24_P295245	ENSG00000198363	ASPH	aspartate beta-hydroxylase (ASPH), transcript variant 4, mRNA	3.00223	0.469349	Group 3	Yes
A_23_P152548	ENSG00000121064	SCPEP1	serine carboxypeptidase 1 (SCPEP1), mRNA	3.01523	0	Group 3	No
A_23_P46149	ENSG00000077585	GPR137B	G protein-coupled receptor 137B (GPR137B), mRNA	3.04404	0	Group 3	No
A_23_P411296	ENSG00000172216	CEBPB	CCAAT/enhancer binding protein (C/EBP), beta (CEBPB), mRNA	3.05001	0.660843	Group 3	No
A_23_P362759	ENSG00000138738	PRDM5	PR domain containing 5 (PRDM5), mRNA	3.0622	0.660843	Group 3	No
A_33_P3232080	ENSG00000204936	CD177	CD177 molecule (CD177), mRNA	3.09139	0.731741	Group 3	No
A_33_P3402526	ENSG00000169826	CSGALNACT2	chondroitin sulfate N-acetylgalactosaminyltransferase 2 (CSGALNACT2), mRNA	3.10548	0	Group 3	No
A_23_P18372	ENSG00000176597	B3GNT5	UDP-GlcNAc:betaGal beta-1,3-N-acetylglucosaminyltransferase 5 (B3GNT5), mRNA	3.14511	0.316092	Group 3	No
A_23_P27315	ENSG00000132205	EMILIN2	elastin microfibril interfacer 2 (EMILIN2), mRNA	3.22602	0	Group 3	No
A_23_P214330	ENSG00000021355	SERPINB1	serpin peptidase inhibitor, clade B (ovalbumin), member 1 (SERPINB1), mRNA	3.24542	0	Group 3	No
A_33_P3245126	A_33_P3245126			3.25158	0.660843	Group 3	No
A_23_P146058	ENSG00000155097	ATP6V1C1	ATPase, H+ transporting, lysosomal 42kDa, V1 subunit C1 (ATP6V1C1), mRNA	3.25217	0	Group 3	No
A_33_P3251776	ENSG00000099377	HSD3B7	hydroxy-delta-5-steroid dehydrogenase, 3 beta- and steroid delta-isomerase 7 (HSD3B7), transcript variant 2, mRNA	3.25354	0	Group 3	No
A_33_P3301410	ENSG00000178896	EXOSC4	exosome component 4 (EXOSC4), mRNA	3.26781	0	Group 3	No
A_23_P76488	ENSG00000134531	EMP1	epithelial membrane protein 1 (EMP1), mRNA	3.2716	0	Group 3	No
A_32_P47754	ENSG00000173262	SLC2A14	solute carrier family 2 (facilitated glucose transporter), member 14	3.27883	0.731741	Group 3	Yes
A_23_P141893	ENSG00000213889	PPM1N	protein phosphatase, Mg2+/Mn2+ dependent, 1N (putative) (PPM1N), mRNA	3.28213	0.731741	Group 3	No
A_24_P81900	ENSG00000059804	SLC2A3	solute carrier family 2 (facilitated glucose transporter), member 3 (SLC2A3), mRNA	3.37042	0.660843	Group 3	No
A_33_P3385785	ENSG00000163221	S100A12	S100 calcium binding protein A12 (S100A12), mRNA	3.37452	0.949157	Group 3	Yes
A_21_P0006457	ENSG00000229807	XIST	X (inactive)-specific transcript (non-protein coding) (XIST), non-coding RNA	3.37552	0.316092	Group 3	No
A_33_P3300635	ENSG00000123836	PFKFB2	6-phosphofructo-2-kinase/fructose-2,6-biphosphatase 2 (PFKFB2), transcript variant 1, mRNA	3.3828	0	Group 3	No
A_33_P3275055	ENSG00000184005	ST6GALNAC3	ST6 (alpha-N-acetyl-neuraminyl-2,3-beta-galactosyl-1,3)-N-acetylgalactosaminide alpha-2,6-sialyltransferase 3 (ST6GALNAC3), transcript variant 2, mRNA	3.38795	0	Group 3	No
A_23_P147805	ENSG00000183696	UPP1	uridine phosphorylase 1	3.39645	0	Group 3	No
A_23_P396299	ENSG00000177112	MRVI1-AS1	MRVI1 antisense RNA 1	3.40774	0	Group 3	No
A_19_P00316185		XLOC_005810	BROAD Institute lincRNA (XLOC_005810), lincRNA	3.41256	0.316092	Group 3	Yes
A_23_P50638	ENSG00000171236	LRG1	leucine-rich alpha-2-glycoprotein 1 (LRG1), mRNA	3.41384	0.660843	Group 3	No
A_21_P0014944		LOC100653206	PREDICTED: hypothetical LOC100653206 (LOC100653206), miscRNA	3.41997	0.316092	Group 3	Yes
A_23_P19482	ENSG00000213722	DDAH2	dimethylarginine dimethylaminohydrolase 2 (DDAH2), mRNA	3.46805	0.469349	Group 3	Yes
A_21_P0010806		XLOC_l2_001496	BROAD Institute lincRNA (XLOC_l2_001496), lincRNA	3.47667	0	Group 3	Yes
A_24_P157926	ENSG00000118503	TNFAIP3	tumor necrosis factor, alpha-induced protein 3 (TNFAIP3), mRNA	3.53401	0.316092	Group 3	No
A_33_P3383762	A_33_P3383762			3.6017	0.660843	Group 3	Yes
A_23_P8640	ENSG00000164850	GPER	G protein-coupled estrogen receptor 1 (GPER), transcript variant 3, mRNA	3.62419	0.731741	Group 3	Yes
A_24_P267686	A_24_P267686			3.66572	0.949157	Group 3	No
A_23_P128084	ENSG00000135424	ITGA7	integrin, alpha 7 (ITGA7), transcript variant 2, mRNA	3.68479	0	Group 3	Yes
A_23_P67864	ENSG00000138031	ADCY3	adenylate cyclase 3 (ADCY3), mRNA	3.70561	0	Group 3	No
A_23_P162300	ENSG00000090376	IRAK3	interleukin-1 receptor-associated kinase 3 (IRAK3), transcript variant 1, mRNA	3.71322	0.316092	Group 3	Yes
A_23_P336554	ENSG00000196083	IL1RAP	interleukin 1 receptor accessory protein (IL1RAP), transcript variant 2, mRNA	3.72072	0.660843	Group 3	No
A_33_P3352578	ENSG00000166527	CLEC4D	C-type lectin domain family 4, member D (CLEC4D), mRNA	3.78119	0	Group 3	Yes
A_23_P122863	ENSG00000106070	GRB10	growth factor receptor-bound protein 10 (GRB10), transcript variant 4, mRNA	3.86398	0.469349	Group 3	Yes
A_23_P256821	ENSG00000203710	CR1	complement component (3b/4b) receptor 1 (Knops blood group) (CR1), transcript variant S, mRNA	3.88543	0.660843	Group 3	Yes
A_23_P33723	ENSG00000177575	CD163	CD163 molecule (CD163), transcript variant 1, mRNA	3.94947	0.949157	Group 3	No
A_24_P71904	ENSG00000164120	HPGD	hydroxyprostaglandin dehydrogenase 15-(NAD) (HPGD), transcript variant 1, mRNA	3.96343	0	Group 3	No
A_24_P183128	ENSG00000145287	PLAC8	placenta-specific 8 (PLAC8), transcript variant 2, mRNA	4.08397	0	Group 3	No
A_23_P99397	ENSG00000180776	ZDHHC20	zinc finger, DHHC-type containing 20 (ZDHHC20), mRNA	4.09613	0	Group 3	No
A_33_P3352382	ENSG00000118520	ARG1	arginase, liver (ARG1), transcript variant 1, mRNA	4.23511	0.660843	Group 3	Yes
A_23_P29005	ENSG00000155307	SAMSN1	SAM domain, SH3 domain and nuclear localization signals 1 (SAMSN1), mRNA	4.26643	0	Group 3	No
A_24_P38081	ENSG00000096060	FKBP5	FK506 binding protein 5 (FKBP5), transcript variant 1, mRNA	4.4722	0	Group 3	No
A_23_P72117	ENSG00000172594	SMPDL3A	sphingomyelin phosphodiesterase, acid-like 3A (SMPDL3A), mRNA	4.49559	0	Group 3	No
A_24_P261259	ENSG00000170525	PFKFB3	6-phosphofructo-2-kinase/fructose-2,6-biphosphatase 3 (PFKFB3), transcript variant 1, mRNA	4.52812	0.469349	Group 3	No
A_23_P384517	ENSG00000163754	GYG1	glycogenin 1 (GYG1), transcript variant 1, mRNA	4.61362	0	Group 3	Yes
A_23_P170186	ENSG00000178814	OPLAH	5-oxoprolinase (ATP-hydrolysing) (OPLAH), mRNA	4.67107	0.316092	Group 3	Yes
A_33_P3346461	ENSG00000249437	NAIP	NLR family, apoptosis inhibitory protein	4.70609	0.469349	Group 3	No
A_23_P152002	ENSG00000140379	BCL2A1	BCL2-related protein A1 (BCL2A1), transcript variant 1, mRNA	4.82847	0	Group 3	No
A_32_P108254	ENSG00000108950	FAM20A	family with sequence similarity 20, member A (FAM20A), transcript variant 1, mRNA	4.90711	0.469349	Group 3	Yes
A_23_P58396	ENSG00000145431	PDGFC	platelet derived growth factor C (PDGFC), transcript variant 1, mRNA	4.93297	0	Group 3	No
A_24_P927716	ENSG00000249138	SLED1	proteoglycan 3 pseudogene (SLED1), non-coding RNA	4.93889	0.731741	Group 3	No
A_32_P208350	ENSG00000156414	TDRD9	tudor domain containing 9 (TDRD9), mRNA	5.03904	0.316092	Group 3	Yes
A_32_P49668		LOC100653060	PREDICTED: putative POM121-like protein 1-like (LOC100653060), mRNA	5.21589	0.660843	Group 3	Yes
A_23_P23221	ENSG00000116717	GADD45A	growth arrest and DNA-damage-inducible, alpha (GADD45A), transcript variant 1, mRNA	5.34292	0	Group 3	Yes
A_23_P161458	ENSG00000152463	OLAH	oleoyl-ACP hydrolase (OLAH), transcript variant 2, mRNA	5.50426	0	Group 3	No
A_23_P259506	ENSG00000120306	C5orf32	chromosome 5 open reading frame 32 (C5orf32), mRNA	5.63546	0	Group 3	Yes
A_23_P209625	ENSG00000138061	CYP1B1	cytochrome P450, family 1, subfamily B, polypeptide 1 (CYP1B1), mRNA	6.60658	0.469349	Group 3	Yes
A_21_P0011752		XLOC_l2_007062		7.01461	0.949157	Group 3	Yes
A_23_P330561	ENSG00000183019	MCEMP1	mast cell-expressed membrane protein 1	7.22414	0	Group 3	Yes
A_23_P75769	ENSG00000110079	MS4A4A	membrane-spanning 4-domains, subfamily A, member 4 (MS4A4A), transcript variant 2, mRNA	8.50761	0	Group 3	Yes
A_33_P3211666	ENSG00000115604	IL18R1	interleukin 18 receptor 1 (IL18R1), mRNA	9.37266	0	Group 3	No
A_24_P63019	ENSG00000115590	IL1R2	interleukin 1 receptor, type II (IL1R2), transcript variant 1, mRNA	9.38007	0	Group 3	No
A_33_P3226154	ENSG00000211592	IGKC	immunoglobulin kappa constant	0.073783	0	Group 2	Yes
A_24_P212024	ENSG00000244575	IGKV1-27	immunoglobulin kappa variable 1-27	0.0843535	0	Group 2	Yes
A_24_P417352	ENSG00000211899	IGHM	immunoglobulin heavy constant mu	0.0867604	0.392114	Group 2	Yes
A_24_P626951	ENSG00000240864	IGKV1-16	immunoglobulin kappa variable 1-16	0.0915178	0	Group 2	Yes
A_32_P148122	ENSG00000239975	IGKV1D-33	immunoglobulin kappa variable 1D-33	0.10211	0	Group 2	Yes
A_33_P3281444	ENSG00000242580	IGKV1D-43	immunoglobulin kappa variable 1D-43	0.107074	0	Group 2	Yes
A_23_P167168	ENSG00000132465	IGJ	immunoglobulin J polypeptide, linker protein for immunoglobulin alpha and mu polypeptides (IGJ), mRNA	0.129046	0.392114	Group 2	Yes
A_33_P3351180	ENSG00000211895	IGHA1	immunoglobulin heavy constant alpha 1	0.129714	0	Group 2	Yes
A_33_P3337609	ENSG00000271351	IGKV1OR2-9	immunoglobulin kappa variable 1/OR2-9 (pseudogene)	0.132654	0.392114	Group 2	Yes
A_32_P159192	ENSG00000243063	IGKV3-7	immunoglobulin kappa variable 3-7 (non-functional)	0.137412	0.469349	Group 2	Yes
A_33_P3263319	ENSG00000211897	IGHG3	immunoglobulin heavy constant gamma 3 (G3m marker)	0.138533	0.392114	Group 2	Yes
A_33_P3379039	ENSG00000254709	IGLL5	immunoglobulin lambda-like polypeptide 5 (IGLL5), transcript variant 1, mRNA	0.139714	0	Group 2	Yes
A_33_P3301075	ENSG00000211949	IGHV3-33	immunoglobulin heavy variable 3-33	0.141664	0.469349	Group 2	Yes
A_33_P3424591	ENSG00000211896	IGHG1	immunoglobulin heavy constant gamma 1 (G1m marker)	0.142458	0.392114	Group 2	Yes
A_23_P361654	ENSG00000241244	IGKV1D-16	immunoglobulin kappa variable 1D-16	0.148346	0.660843	Group 2	Yes
A_33_P3395675	ENSG00000211677	IGLC2	immunoglobulin lambda constant 2 (Kern-Oz- marker)	0.148504	0	Group 2	Yes
A_24_P15388	ENSG00000224650	IGHV3-74	immunoglobulin heavy variable 3-74	0.15086	0.469349	Group 2	Yes
A_23_P21800	ENSG00000239951	IGKV3-20	immunoglobulin kappa variable 3-20	0.151567	0.731741	Group 2	Yes
A_24_P357847	ENSG00000224041	IGKV3-15	immunoglobulin kappa variable 3-15	0.154353	0.660843	Group 2	Yes
A_33_P3422298	ENSG00000222037	IGLC6	immunoglobulin lambda constant 6 (Kern+Oz- marker, gene/pseudogene)	0.155237	0.392114	Group 2	Yes
A_33_P3364959	ENSG00000211660	IGLV2-23	isolate N1408L immunoglobulin lambda light chain variable region (IGLV2) mRNA, IGLV2-23*02 allele, partial cds.	0.15587	0.660843	Group 2	Yes
A_33_P3308716	ENSG00000211637	IGLV4-69	immunoglobulin lambda variable 4-69	0.156507	0.731741	Group 2	Yes
A_33_P3289246	ENSG00000211940	IGHV3-9	immunoglobulin heavy variable 3-9	0.16264	0.660843	Group 2	Yes
A_24_P239076	ENSG00000128322	IGLL1	immunoglobulin lambda-like polypeptide 1 (IGLL1), transcript variant 1, mRNA	0.163033	0.392114	Group 2	Yes
A_24_P110242	ENSG00000270472	IGHV3OR16-9	immunoglobulin heavy variable 3/OR16-9 (non-functional)	0.163957	0.392114	Group 2	Yes
A_33_P3424754	ENSG00000211648	IGLV1-47	immunoglobulin lambda variable 1-47	0.166076	0.469349	Group 2	Yes
A_33_P3336822	ENSG00000211651	IGLV1-44	immunoglobulin lambda variable 1-44	0.169738	0.731741	Group 2	Yes
A_24_P813550	ENSG00000224373	IGHV4-59	immunoglobulin heavy variable 4-59	0.172563	0.469349	Group 2	Yes
A_33_P3424612	ENSG00000211632	IGKV3D-11	immunoglobulin kappa variable 3-11	0.173552	0.949157	Group 2	Yes
A_24_P510357	ENSG00000211666	IGLV2-14	immunoglobulin lambda variable 2-14	0.174015	0.660843	Group 2	Yes
A_33_P3281435	ENSG00000239819	IGKV1D-8	immunoglobulin kappa variable 1D-8	0.175297	0.469349	Group 2	Yes
A_33_P3331220	ENSG00000211957	IGHV3-35	immunoglobulin heavy variable 3-35 (non-functional)	0.177512	0.731741	Group 2	Yes
A_33_P3331178	ENSG00000211944	IGHV3-16	immunoglobulin heavy variable 3-16 (non-functional)	0.187584	0.469349	Group 2	Yes
A_32_P157927	ENSG00000211598	IGKV4-1	immunoglobulin kappa variable 4-1	0.190005	0.660843	Group 2	Yes
A_33_P3304707	ENSG00000211671	IGLV2-8	immunoglobulin lambda variable 2-8	0.192301	0.949157	Group 2	Yes
A_33_P3399985	ENSG00000241566	IGKV2D-24	immunoglobulin kappa variable 2D-24 (non-functional)	0.207979	0.949157	Group 2	Yes
A_33_P3331228	ENSG00000211943	IGHV3-15	immunoglobulin heavy variable 3-15	0.212293	0.731741	Group 2	Yes
A_33_P3372647	ENSG00000211655	IGLV1-36	immunoglobulin lambda variable 1-36	0.219328	0.660843	Group 2	Yes
A_24_P161764	ENSG00000211935	IGHV1-3	immunoglobulin heavy variable 1-3	0.229808	0.469349	Group 2	Yes
A_24_P204727	ENSG00000211964	IGHV3-48	immunoglobulin heavy variable 3-48	0.234958	0.731741	Group 2	Yes
A_24_P315941	ENSG00000211965	IGHV3-49	immunoglobulin heavy variable 3-49	0.240115	0.469349	Group 2	Yes
A_24_P318990	ENSG00000211645	IGLV1-50	immunoglobulin lambda variable 1-50 (non-functional)	0.25129	0.731741	Group 1	No
A_33_P3331150	ENSG00000211946	IGHV3-20	immunoglobulin heavy variable 3-20	0.2545	0.731741	Group 2	Yes
A_33_P3331193	ENSG00000211945	IGHV1-18	immunoglobulin heavy variable 1-18	0.267894	0.949157	Group 2	Yes
A_24_P367432	ENSG00000211973	IGHV1-69	immunoglobulin heavy variable 1-69	0.291266	0.949157	Group 2	Yes
A_24_P683861	ENSG00000211934	IGHV1-2	immunoglobulin heavy variable 1-2	0.306631	0.469349	Group 2	No
A_32_P190951	ENSG00000211962	IGHV1-46	immunoglobulin heavy variable 1-46	0.36222	0.392114	Group 1	No
A_33_P3351745	ENSG00000213413	PVRIG	poliovirus receptor related immunoglobulin domain containing (PVRIG), mRNA	0.413182	0.949157	Group 1	No
A_32_P379467	ENSG00000167178	ISLR2	immunoglobulin superfamily containing leucine-rich repeat 2 (ISLR2), transcript variant 2, mRNA	2.35211	0.316092	Group 3	No
A_24_P370172	ENSG00000187116	LILRA5	leukocyte immunoglobulin-like receptor, subfamily A (with TM domain), member 5 (LILRA5), transcript variant 3, mRNA	3.44749	0.949157	Group 3	Yes
A Fold-change of deceased samples compared to survivor acute samples. Fold changes <0.5 or >2.0 were considered significant.
B qvalue indicates the significance of the comparison between the deceased and survivor transcript levels. qvalues <1.0 were considered signficant,
