# Supplementary material for: Cathelicidin Insufficiency in Patients with Fatal Leptospirosis
Source: PLoS Pathog. 2016 Nov 3;12(11):e1005943. doi: 10.1371/journal.ppat.1005943 (PMC5094754; doi:10.1371/journal.ppat.1005943)
Supplement: S4 Table — (XLSX) [file ppat.1005943.s007.xlsx]

## Sheet: Table S4 InnateDB Sig Terms
Table S4. All significant REACTOME functional pathways for differentially expressed transcripts in Deceased vs Survivors (DvS).
DvS Group	Pathway Name/GOTerm	Pathway ID	Source Name	Pathway uploaded gene count	Genes in InnateDB for this entity	-log(pvalue)	Gene Symbols	Genes (Symbol|IDBG-ID|Ensembl|Entrez|Fold Change|P-Value)
1	Asthma	2818	KEGG	7	28	8.84434	CD40LG; HLA-DMA; HLA-DMB; HLA-DOA; HLA-DPA1; HLA-DPB1; HLA-DRA;	CD40LG|IDBG-87653|ENSG00000102245|959|; HLA-DMA|IDBG-81652|ENSG00000204257|3108|; HLA-DMB|IDBG-403749|ENSG00000242574|3109|; HLA-DOA|IDBG-81729|ENSG00000204252|3111|; HLA-DPA1|IDBG-81778|ENSG00000231389|3113|; HLA-DPB1|IDBG-230487|ENSG00000223865|3115|; HLA-DRA|IDBG-80796|ENSG00000204287|3122|;
1	Allograft rejection	2793	KEGG	7	35	8.40022	CD40LG; HLA-DMA; HLA-DMB; HLA-DOA; HLA-DPA1; HLA-DPB1; HLA-DRA;	CD40LG|IDBG-87653|ENSG00000102245|959|; HLA-DMA|IDBG-81652|ENSG00000204257|3108|; HLA-DMB|IDBG-403749|ENSG00000242574|3109|; HLA-DOA|IDBG-81729|ENSG00000204252|3111|; HLA-DPA1|IDBG-81778|ENSG00000231389|3113|; HLA-DPB1|IDBG-230487|ENSG00000223865|3115|; HLA-DRA|IDBG-80796|ENSG00000204287|3122|;
1	Antigen processing and presentation	493	KEGG	8	71	7.88644	CD74; CD8B; HLA-DMA; HLA-DMB; HLA-DOA; HLA-DPA1; HLA-DPB1; HLA-DRA;	CD74|IDBG-53594|ENSG00000019582|972|; CD8B|IDBG-60041|ENSG00000172116|100996919,926|; HLA-DMA|IDBG-81652|ENSG00000204257|3108|; HLA-DMB|IDBG-403749|ENSG00000242574|3109|; HLA-DOA|IDBG-81729|ENSG00000204252|3111|; HLA-DPA1|IDBG-81778|ENSG00000231389|3113|; HLA-DPB1|IDBG-230487|ENSG00000223865|3115|; HLA-DRA|IDBG-80796|ENSG00000204287|3122|;
1	Intestinal immune network for IgA production	8118	KEGG	7	46	7.81474	CD40LG; HLA-DMA; HLA-DMB; HLA-DOA; HLA-DPA1; HLA-DPB1; HLA-DRA;	CD40LG|IDBG-87653|ENSG00000102245|959|; HLA-DMA|IDBG-81652|ENSG00000204257|3108|; HLA-DMB|IDBG-403749|ENSG00000242574|3109|; HLA-DOA|IDBG-81729|ENSG00000204252|3111|; HLA-DPA1|IDBG-81778|ENSG00000231389|3113|; HLA-DPB1|IDBG-230487|ENSG00000223865|3115|; HLA-DRA|IDBG-80796|ENSG00000204287|3122|;
1	Autoimmune thyroid disease	2799	KEGG	7	50	7.64593	CD40LG; HLA-DMA; HLA-DMB; HLA-DOA; HLA-DPA1; HLA-DPB1; HLA-DRA;	CD40LG|IDBG-87653|ENSG00000102245|959|; HLA-DMA|IDBG-81652|ENSG00000204257|3108|; HLA-DMB|IDBG-403749|ENSG00000242574|3109|; HLA-DOA|IDBG-81729|ENSG00000204252|3111|; HLA-DPA1|IDBG-81778|ENSG00000231389|3113|; HLA-DPB1|IDBG-230487|ENSG00000223865|3115|; HLA-DRA|IDBG-80796|ENSG00000204287|3122|;
1	Viral myocarditis	8123	KEGG	7	56	7.36712	CD40LG; HLA-DMA; HLA-DMB; HLA-DOA; HLA-DPA1; HLA-DPB1; HLA-DRA;	CD40LG|IDBG-87653|ENSG00000102245|959|; HLA-DMA|IDBG-81652|ENSG00000204257|3108|; HLA-DMB|IDBG-403749|ENSG00000242574|3109|; HLA-DOA|IDBG-81729|ENSG00000204252|3111|; HLA-DPA1|IDBG-81778|ENSG00000231389|3113|; HLA-DPB1|IDBG-230487|ENSG00000223865|3115|; HLA-DRA|IDBG-80796|ENSG00000204287|3122|;
1	Cell adhesion molecules (CAMs)	440	KEGG	9	144	7.09458	CD2; CD40LG; CD8B; HLA-DMA; HLA-DMB; HLA-DOA; HLA-DPA1; HLA-DPB1; HLA-DRA;	CD2|IDBG-101417|ENSG00000116824|914|; CD40LG|IDBG-87653|ENSG00000102245|959|; CD8B|IDBG-60041|ENSG00000172116|100996919,926|; HLA-DMA|IDBG-81652|ENSG00000204257|3108|; HLA-DMB|IDBG-403749|ENSG00000242574|3109|; HLA-DOA|IDBG-81729|ENSG00000204252|3111|; HLA-DPA1|IDBG-81778|ENSG00000231389|3113|; HLA-DPB1|IDBG-230487|ENSG00000223865|3115|; HLA-DRA|IDBG-80796|ENSG00000204287|3122|;
1	Graft-versus-host disease	2807	KEGG	6	37	7.01597	HLA-DMA; HLA-DMB; HLA-DOA; HLA-DPA1; HLA-DPB1; HLA-DRA;	HLA-DMA|IDBG-81652|ENSG00000204257|3108|; HLA-DMB|IDBG-403749|ENSG00000242574|3109|; HLA-DOA|IDBG-81729|ENSG00000204252|3111|; HLA-DPA1|IDBG-81778|ENSG00000231389|3113|; HLA-DPB1|IDBG-230487|ENSG00000223865|3115|; HLA-DRA|IDBG-80796|ENSG00000204287|3122|;
1	Type I diabetes mellitus	525	KEGG	6	41	6.83167	HLA-DMA; HLA-DMB; HLA-DOA; HLA-DPA1; HLA-DPB1; HLA-DRA;	HLA-DMA|IDBG-81652|ENSG00000204257|3108|; HLA-DMB|IDBG-403749|ENSG00000242574|3109|; HLA-DOA|IDBG-81729|ENSG00000204252|3111|; HLA-DPA1|IDBG-81778|ENSG00000231389|3113|; HLA-DPB1|IDBG-230487|ENSG00000223865|3115|; HLA-DRA|IDBG-80796|ENSG00000204287|3122|;
	Pathways
1	MHC class II antigen presentation	13065	REACTOME	8	111	6.79718	CD74; HLA-DMA; HLA-DMB; HLA-DOA; HLA-DPA1; HLA-DPB1; HLA-DRA; TUBB1	CD74|IDBG-53594|ENSG00000019582|972|; HLA-DMA|IDBG-81652|ENSG00000204257|3108|; HLA-DMB|IDBG-403749|ENSG00000242574|3109|; HLA-DOA|IDBG-81729|ENSG00000204252|3111|; HLA-DPA1|IDBG-81778|ENSG00000231389|3113|; HLA-DPB1|IDBG-230487|ENSG00000223865|3115|; HLA-DRA|IDBG-80796|ENSG00000204287|3122|; TUBB1|IDBG-83326|ENSG00000101162|81027|;
1	Staphylococcus aureus infection	10357	KEGG	6	53	6.18082	HLA-DMA; HLA-DMB; HLA-DOA; HLA-DPA1; HLA-DPB1; HLA-DRA;	HLA-DMA|IDBG-81652|ENSG00000204257|3108|; HLA-DMB|IDBG-403749|ENSG00000242574|3109|; HLA-DOA|IDBG-81729|ENSG00000204252|3111|; HLA-DPA1|IDBG-81778|ENSG00000231389|3113|; HLA-DPB1|IDBG-230487|ENSG00000223865|3115|; HLA-DRA|IDBG-80796|ENSG00000204287|3122|;
1	Leishmaniasis	10355	KEGG	6	71	5.44728	HLA-DMA; HLA-DMB; HLA-DOA; HLA-DPA1; HLA-DPB1; HLA-DRA;	HLA-DMA|IDBG-81652|ENSG00000204257|3108|; HLA-DMB|IDBG-403749|ENSG00000242574|3109|; HLA-DOA|IDBG-81729|ENSG00000204252|3111|; HLA-DPA1|IDBG-81778|ENSG00000231389|3113|; HLA-DPB1|IDBG-230487|ENSG00000223865|3115|; HLA-DRA|IDBG-80796|ENSG00000204287|3122|;
1	Toxoplasmosis	10385	KEGG	7	119	5.40243	CD40LG; HLA-DMA; HLA-DMB; HLA-DOA; HLA-DPA1; HLA-DPB1; HLA-DRA;	CD40LG|IDBG-87653|ENSG00000102245|959|; HLA-DMA|IDBG-81652|ENSG00000204257|3108|; HLA-DMB|IDBG-403749|ENSG00000242574|3109|; HLA-DOA|IDBG-81729|ENSG00000204252|3111|; HLA-DPA1|IDBG-81778|ENSG00000231389|3113|; HLA-DPB1|IDBG-230487|ENSG00000223865|3115|; HLA-DRA|IDBG-80796|ENSG00000204287|3122|;
1	Systemic lupus erythematosus	2805	KEGG	7	126	5.26562	CD40LG; HLA-DMA; HLA-DMB; HLA-DOA; HLA-DPA1; HLA-DPB1; HLA-DRA;	CD40LG|IDBG-87653|ENSG00000102245|959|; HLA-DMA|IDBG-81652|ENSG00000204257|3108|; HLA-DMB|IDBG-403749|ENSG00000242574|3109|; HLA-DOA|IDBG-81729|ENSG00000204252|3111|; HLA-DPA1|IDBG-81778|ENSG00000231389|3113|; HLA-DPB1|IDBG-230487|ENSG00000223865|3115|; HLA-DRA|IDBG-80796|ENSG00000204287|3122|;
1	Chemokine receptors bind chemokines	13243	REACTOME	5	53	4.7806	CCR3; CX3CR1; CXCR3; PF4; PPBP	CCR3|IDBG-30125|ENSG00000183625|1232|; CX3CR1|IDBG-26647|ENSG00000168329|1524|; CXCR3|IDBG-76333|ENSG00000186810|2833|; PF4|IDBG-24097|ENSG00000163737|5196|; PPBP|IDBG-24129|ENSG00000163736|5473|;
1	Phagosome	10394	KEGG	7	152	4.77464	HLA-DMA; HLA-DMB; HLA-DOA; HLA-DPA1; HLA-DPB1; HLA-DRA; TUBB1;	HLA-DMA|IDBG-81652|ENSG00000204257|3108|; HLA-DMB|IDBG-403749|ENSG00000242574|3109|; HLA-DOA|IDBG-81729|ENSG00000204252|3111|; HLA-DPA1|IDBG-81778|ENSG00000231389|3113|; HLA-DPB1|IDBG-230487|ENSG00000223865|3115|; HLA-DRA|IDBG-80796|ENSG00000204287|3122|; TUBB1|IDBG-83326|ENSG00000101162|81027|;
1	Generation of second messenger molecules	13069	REACTOME	4	31	4.33967	EVL; HLA-DPA1; HLA-DPB1; HLA-DRA	EVL|IDBG-19953|ENSG00000196405|51466|; HLA-DPA1|IDBG-81778|ENSG00000231389|3113|; HLA-DPB1|IDBG-230487|ENSG00000223865|3115|; HLA-DRA|IDBG-80796|ENSG00000204287|3122|;
1	Cytokine-cytokine receptor interaction	515	KEGG	8	258	4.29415	CCR3; CD27; CD40LG; CX3CR1; CXCR3; PF4; PPBP; TNFRSF25;	CCR3|IDBG-30125|ENSG00000183625|1232|; CD27|IDBG-14014|ENSG00000139193|939|; CD40LG|IDBG-87653|ENSG00000102245|959|; CX3CR1|IDBG-26647|ENSG00000168329|1524|; CXCR3|IDBG-76333|ENSG00000186810|2833|; PF4|IDBG-24097|ENSG00000163737|5196|; PPBP|IDBG-24129|ENSG00000163736|5473|; TNFRSF25|IDBG-227097|ENSG00000215788|8718|;
1	Activation of csk by camp-dependent protein kinase inhibits signaling through the t cell receptor	4160	PID BIOCARTA	4	38	4.02676	ADRB2; CCR3; HLA-DRA; PRKAR1B;	ADRB2|IDBG-52685|ENSG00000169252|154|; CCR3|IDBG-30125|ENSG00000183625|1232|; HLA-DRA|IDBG-80796|ENSG00000204287|3122|; PRKAR1B|IDBG-6154|ENSG00000188191|5575|;
1	Adaptive Immune System	18371	REACTOME	11	604	3.93173	CD40LG; CD74; CD8B; EVL; HLA-DMA; HLA-DMB; HLA-DOA; HLA-DPA1; HLA-DPB1; HLA-DRA; TUBB1	CD40LG|IDBG-87653|ENSG00000102245|959|; CD74|IDBG-53594|ENSG00000019582|972|; CD8B|IDBG-60041|ENSG00000172116|100996919,926|; EVL|IDBG-19953|ENSG00000196405|51466|; HLA-DMA|IDBG-81652|ENSG00000204257|3108|; HLA-DMB|IDBG-403749|ENSG00000242574|3109|; HLA-DOA|IDBG-81729|ENSG00000204252|3111|; HLA-DPA1|IDBG-81778|ENSG00000231389|3113|; HLA-DPB1|IDBG-230487|ENSG00000223865|3115|; HLA-DRA|IDBG-80796|E…
1	Immune System	18444	REACTOME	15	1127	3.92598	CD40LG; CD74; CD8B; EVL; HLA-DMA; HLA-DMB; HLA-DOA; HLA-DPA1; HLA-DPB1; HLA-DRA; HSP90B1; PRKAR1B; RPS6KA5; TLR7; TUBB1	CD40LG|IDBG-87653|ENSG00000102245|959|; CD74|IDBG-53594|ENSG00000019582|972|; CD8B|IDBG-60041|ENSG00000172116|100996919,926|; EVL|IDBG-19953|ENSG00000196405|51466|; HLA-DMA|IDBG-81652|ENSG00000204257|3108|; HLA-DMB|IDBG-403749|ENSG00000242574|3109|; HLA-DOA|IDBG-81729|ENSG00000204252|3111|; HLA-DPA1|IDBG-81778|ENSG00000231389|3113|; HLA-DPB1|IDBG-230487|ENSG00000223865|3115|; HLA-DRA|IDBG-80796|E…
1	Translocation of ZAP-70 to Immunological synapse	13070	REACTOME	3	17	3.6841	HLA-DPA1; HLA-DPB1; HLA-DRA	HLA-DPA1|IDBG-81778|ENSG00000231389|3113|; HLA-DPB1|IDBG-230487|ENSG00000223865|3115|; HLA-DRA|IDBG-80796|ENSG00000204287|3122|;
1	Phosphorylation of CD3 and TCR zeta chains	13071	REACTOME	3	18	3.62547	HLA-DPA1; HLA-DPB1; HLA-DRA	HLA-DPA1|IDBG-81778|ENSG00000231389|3113|; HLA-DPB1|IDBG-230487|ENSG00000223865|3115|; HLA-DRA|IDBG-80796|ENSG00000204287|3122|;
1	Chemokine signaling pathway	4389	KEGG	6	181	3.39723	CCR3; CX3CR1; CXCR3; GNG11; PF4; PPBP;	CCR3|IDBG-30125|ENSG00000183625|1232|; CX3CR1|IDBG-26647|ENSG00000168329|1524|; CXCR3|IDBG-76333|ENSG00000186810|2833|; GNG11|IDBG-27227|ENSG00000127920|2791|; PF4|IDBG-24097|ENSG00000163737|5196|; PPBP|IDBG-24129|ENSG00000163736|5473|;
1	PD-1 signaling	13091	REACTOME	3	22	3.39086	HLA-DPA1; HLA-DPB1; HLA-DRA	HLA-DPA1|IDBG-81778|ENSG00000231389|3113|; HLA-DPB1|IDBG-230487|ENSG00000223865|3115|; HLA-DRA|IDBG-80796|ENSG00000204287|3122|;
1	TCR signaling	17097	REACTOME	4	61	3.35984	EVL; HLA-DPA1; HLA-DPB1; HLA-DRA	EVL|IDBG-19953|ENSG00000196405|51466|; HLA-DPA1|IDBG-81778|ENSG00000231389|3113|; HLA-DPB1|IDBG-230487|ENSG00000223865|3115|; HLA-DRA|IDBG-80796|ENSG00000204287|3122|;
1	Stathmin and breast cancer resistance to antimicrotubule agents	4084	PID BIOCARTA	3	23	3.34845	CD2; PRKAR1B; TUBB1;	CD2|IDBG-101417|ENSG00000116824|914|; PRKAR1B|IDBG-6154|ENSG00000188191|5575|; TUBB1|IDBG-83326|ENSG00000101162|81027|;
1	Activation of camp-dependent protein kinase pka	4094	PID BIOCARTA	3	26	3.21763	ADRB2; CCR3; PRKAR1B;	ADRB2|IDBG-52685|ENSG00000169252|154|; CCR3|IDBG-30125|ENSG00000183625|1232|; PRKAR1B|IDBG-6154|ENSG00000188191|5575|;
1	Formation of Fibrin Clot (Clotting Cascade)	17550	REACTOME	3	36	2.80664	F13A1; GP1BB; PF4	F13A1|IDBG-59186|ENSG00000124491|2162|; GP1BB|IDBG-121855|ENSG00000203618|2812|; PF4|IDBG-24097|ENSG00000163737|5196|;
1	Chrebp regulation by carbohydrates and camp	4074	PID BIOCARTA	3	37	2.80013	ADRB2; CCR3; PRKAR1B;	ADRB2|IDBG-52685|ENSG00000169252|154|; CCR3|IDBG-30125|ENSG00000183625|1232|; PRKAR1B|IDBG-6154|ENSG00000188191|5575|;
1	Hematopoietic cell lineage	415	KEGG	4	88	2.79047	CD2; CD8B; GP1BB; HLA-DRA;	CD2|IDBG-101417|ENSG00000116824|914|; CD8B|IDBG-60041|ENSG00000172116|100996919,926|; GP1BB|IDBG-121855|ENSG00000203618|2812|; HLA-DRA|IDBG-80796|ENSG00000204287|3122|;
1	Downstream TCR signaling	13068	REACTOME	3	44	2.59106	HLA-DPA1; HLA-DPB1; HLA-DRA	HLA-DPA1|IDBG-81778|ENSG00000231389|3113|; HLA-DPB1|IDBG-230487|ENSG00000223865|3115|; HLA-DRA|IDBG-80796|ENSG00000204287|3122|;
1	Peptide ligand-binding receptors	13249	REACTOME	5	185	2.52177	CCR3; CX3CR1; CXCR3; PF4; PPBP	CCR3|IDBG-30125|ENSG00000183625|1232|; CX3CR1|IDBG-26647|ENSG00000168329|1524|; CXCR3|IDBG-76333|ENSG00000186810|2833|; PF4|IDBG-24097|ENSG00000163737|5196|; PPBP|IDBG-24129|ENSG00000163736|5473|;
1	Hemostasis	19856	REACTOME	8	508	2.52057	CD2; F13A1; GNG11; GP1BB; PF4; PPBP; PRKAR1B; TUBB1	CD2|IDBG-101417|ENSG00000116824|914|; F13A1|IDBG-59186|ENSG00000124491|2162|; GNG11|IDBG-27227|ENSG00000127920|2791|; GP1BB|IDBG-121855|ENSG00000203618|2812|; PF4|IDBG-24097|ENSG00000163737|5196|; PPBP|IDBG-24129|ENSG00000163736|5473|; PRKAR1B|IDBG-6154|ENSG00000188191|5575|; TUBB1|IDBG-83326|ENSG00000101162|81027|;
1	Phospholipase c-epsilon pathway	3996	PID BIOCARTA	2	12	2.48885	ADRB2; PRKAR1B;	ADRB2|IDBG-52685|ENSG00000169252|154|; PRKAR1B|IDBG-6154|ENSG00000188191|5575|;
1	Antigen processing and presentation	4144	PID BIOCARTA	2	13	2.44157	CD74; HLA-DRA;	CD74|IDBG-53594|ENSG00000019582|972|; HLA-DRA|IDBG-80796|ENSG00000204287|3122|;
1	Trafficking and processing of endosomal TLR	13047	REACTOME	2	13	2.44157	HSP90B1; TLR7	HSP90B1|IDBG-54092|ENSG00000166598|100500842,7184|; TLR7|IDBG-44230|ENSG00000196664|51284|;
1	Class A/1 (Rhodopsin-like receptors)	13250	REACTOME	6	307	2.37181	ADRB2; CCR3; CX3CR1; CXCR3; PF4; PPBP	ADRB2|IDBG-52685|ENSG00000169252|154|; CCR3|IDBG-30125|ENSG00000183625|1232|; CX3CR1|IDBG-26647|ENSG00000168329|1524|; CXCR3|IDBG-76333|ENSG00000186810|2833|; PF4|IDBG-24097|ENSG00000163737|5196|; PPBP|IDBG-24129|ENSG00000163736|5473|;
1	GPCR ligand binding	19266	REACTOME	7	433	2.31018	ADRB2; CCR3; CX3CR1; CXCR3; GNG11; PF4; PPBP	ADRB2|IDBG-52685|ENSG00000169252|154|; CCR3|IDBG-30125|ENSG00000183625|1232|; CX3CR1|IDBG-26647|ENSG00000168329|1524|; CXCR3|IDBG-76333|ENSG00000186810|2833|; GNG11|IDBG-27227|ENSG00000127920|2791|; PF4|IDBG-24097|ENSG00000163737|5196|; PPBP|IDBG-24129|ENSG00000163736|5473|;
1	Platelet activation, signaling and aggregation	17662	REACTOME	5	219	2.28002	F13A1; GNG11; GP1BB; PF4; PPBP	F13A1|IDBG-59186|ENSG00000124491|2162|; GNG11|IDBG-27227|ENSG00000127920|2791|; GP1BB|IDBG-121855|ENSG00000203618|2812|; PF4|IDBG-24097|ENSG00000163737|5196|; PPBP|IDBG-24129|ENSG00000163736|5473|;
1	Interferon gamma signaling	13077	REACTOME	3	63	2.24549	HLA-DPA1; HLA-DPB1; HLA-DRA	HLA-DPA1|IDBG-81778|ENSG00000231389|3113|; HLA-DPB1|IDBG-230487|ENSG00000223865|3115|; HLA-DRA|IDBG-80796|ENSG00000204287|3122|;
1	Costimulation by the CD28 family	13092	REACTOME	3	64	2.23635	HLA-DPA1; HLA-DPB1; HLA-DRA	HLA-DPA1|IDBG-81778|ENSG00000231389|3113|; HLA-DPB1|IDBG-230487|ENSG00000223865|3115|; HLA-DRA|IDBG-80796|ENSG00000204287|3122|;
1	G alpha (i) signalling events	13220	REACTOME	5	231	2.22032	CCR3; CXCR3; GNG11; PF4; PPBP	CCR3|IDBG-30125|ENSG00000183625|1232|; CXCR3|IDBG-76333|ENSG00000186810|2833|; GNG11|IDBG-27227|ENSG00000127920|2791|; PF4|IDBG-24097|ENSG00000163737|5196|; PPBP|IDBG-24129|ENSG00000163736|5473|;
1	Common Pathway	13116	REACTOME	2	18	2.21994	F13A1; PF4	F13A1|IDBG-59186|ENSG00000124491|2162|; PF4|IDBG-24097|ENSG00000163737|5196|;
	Cystic fibrosis transmembrane conductance regulator (cftr) and beta 2 adrenergic receptor (b2ar) pathway	4007	PID BIOCARTA	2	19	2.19252	ADRB2; PRKAR1B;	ADRB2|IDBG-52685|ENSG00000169252|154|; PRKAR1B|IDBG-6154|ENSG00000188191|5575|;
1	CXCR3-mediated signaling events	15621	PID NCI	2	21	2.11512	CXCR3; PF4;	CXCR3|IDBG-76333|ENSG00000186810|2833|; PF4|IDBG-24097|ENSG00000163737|5196|;
1	TCR	15915	NETPATH	5	259	2.04445	BDH1; CD2; EVL; LAX1; RPS6KA5;	BDH1|IDBG-71705|ENSG00000161267|622|; CD2|IDBG-101417|ENSG00000116824|914|; EVL|IDBG-19953|ENSG00000196405|51466|; LAX1|IDBG-105972|ENSG00000122188|54900|; RPS6KA5|IDBG-16084|ENSG00000100784|9252|;
1	CD4 T cell receptor signaling	16104	INOH	3	79	2.04365	HLA-DPA1; HLA-DPB1; HLA-DRA;	HLA-DPA1|IDBG-81778|ENSG00000231389|3113|; HLA-DPB1|IDBG-230487|ENSG00000223865|3115|; HLA-DRA|IDBG-80796|ENSG00000204287|3122|;
1	Platelet degranulation	13130	REACTOME	3	78	2.04112	F13A1; PF4; PPBP	F13A1|IDBG-59186|ENSG00000124491|2162|; PF4|IDBG-24097|ENSG00000163737|5196|; PPBP|IDBG-24129|ENSG00000163736|5473|;
1	Ss-arrestins in gpcr desensitization	4015	PID BIOCARTA	2	25	2.00099	ADRB2; CCR3;	ADRB2|IDBG-52685|ENSG00000169252|154|; CCR3|IDBG-30125|ENSG00000183625|1232|;
1	Response to elevated platelet cytosolic Ca2+	13131	REACTOME	3	83	2.00083	F13A1; PF4; PPBP	F13A1|IDBG-59186|ENSG00000124491|2162|; PF4|IDBG-24097|ENSG00000163737|5196|; PPBP|IDBG-24129|ENSG00000163736|5473|;
1	Role of ??-arrestins in the activation and targeting of map kinases	3945	PID BIOCARTA	2	27	1.96038	ADRB2; CCR3;	ADRB2|IDBG-52685|ENSG00000169252|154|; CCR3|IDBG-30125|ENSG00000183625|1232|;
1	Transcription factor creb and its extracellular signals	4014	PID BIOCARTA	2	27	1.96038	PRKAR1B; RPS6KA5;	PRKAR1B|IDBG-6154|ENSG00000188191|5575|; RPS6KA5|IDBG-16084|ENSG00000100784|9252|;
1	Roles of ?? arrestin dependent recruitment of src kinases in gpcr signaling	4114	PID BIOCARTA	2	31	1.8509	ADRB2; CCR3;	ADRB2|IDBG-52685|ENSG00000169252|154|; CCR3|IDBG-30125|ENSG00000183625|1232|;
1	Glucagon signaling in metabolic regulation	13556	REACTOME	2	33	1.80596	GNG11; PRKAR1B	GNG11|IDBG-27227|ENSG00000127920|2791|; PRKAR1B|IDBG-6154|ENSG00000188191|5575|;
1	Primary immunodeficiency	2815	KEGG	2	37	1.71748	CD40LG; CD8B;	CD40LG|IDBG-87653|ENSG00000102245|959|; CD8B|IDBG-60041|ENSG00000172116|100996919,926|;
1	Aurora B signaling	15698	PID NCI	2	39	1.68109	NPM1; SEPT1;	NPM1|IDBG-57453|ENSG00000181163|4869|; SEPT1|IDBG-26137|ENSG00000180096|1731|;
1	Ion channels and their functional role in vascular endothelium	4141	PID BIOCARTA	2	41	1.65434	ADRB2; CCR3;	ADRB2|IDBG-52685|ENSG00000169252|154|; CCR3|IDBG-30125|ENSG00000183625|1232|;
1	Recycling pathway of L1	13874	REACTOME	2	41	1.65434	RPS6KA5; TUBB1	RPS6KA5|IDBG-16084|ENSG00000100784|9252|; TUBB1|IDBG-83326|ENSG00000101162|81027|;
1	Glucagon-like Peptide-1 (GLP1) regulates insulin secretion	13552	REACTOME	2	42	1.64158	GNG11; PRKAR1B	GNG11|IDBG-27227|ENSG00000127920|2791|; PRKAR1B|IDBG-6154|ENSG00000188191|5575|;
1	Vasopressin regulates renal water homeostasis via Aquaporins	13140	REACTOME	2	43	1.62921	GNG11; PRKAR1B	GNG11|IDBG-27227|ENSG00000127920|2791|; PRKAR1B|IDBG-6154|ENSG00000188191|5575|;
1	Aquaporin-mediated transport	19789	REACTOME	2	51	1.4955	GNG11; PRKAR1B	GNG11|IDBG-27227|ENSG00000127920|2791|; PRKAR1B|IDBG-6154|ENSG00000188191|5575|;
1	Toll-Like Receptors Cascades	17767	REACTOME	3	140	1.47548	HSP90B1; RPS6KA5; TLR7	HSP90B1|IDBG-54092|ENSG00000166598|100500842,7184|; RPS6KA5|IDBG-16084|ENSG00000100784|9252|; TLR7|IDBG-44230|ENSG00000196664|51284|;
1	IL12-mediated signaling events	15185	PID NCI	2	57	1.41854	CD8B; HLA-DRA;	CD8B|IDBG-60041|ENSG00000172116|100996919,926|; HLA-DRA|IDBG-80796|ENSG00000204287|3122|;
1	Interferon Signaling	18059	REACTOME	3	158	1.35256	HLA-DPA1; HLA-DPB1; HLA-DRA	HLA-DPA1|IDBG-81778|ENSG00000231389|3113|; HLA-DPB1|IDBG-230487|ENSG00000223865|3115|; HLA-DRA|IDBG-80796|ENSG00000204287|3122|;
2	Classical antibody-mediated complement activation	13051	REACTOME	5	16	8.89312	IGHG1; IGHG3; IGKC; IGKV3-20; IGKV4-1	IGHG1|IDBG-124377|ENSG00000211896|102723479,102725426,102725526|; IGHG3|IDBG-124382|ENSG00000211897||; IGKC|IDBG-123549|ENSG00000211592|102724332|; IGKV3-20|IDBG-403640|ENSG00000239951||; IGKV4-1|IDBG-123562|ENSG00000211598||;
2	Creation of C4 and C2 activators	18324	REACTOME	5	21	8.70424	IGHG1; IGHG3; IGKC; IGKV3-20; IGKV4-1	IGHG1|IDBG-124377|ENSG00000211896|102723479,102725426,102725526|; IGHG3|IDBG-124382|ENSG00000211897||; IGKC|IDBG-123549|ENSG00000211592|102724332|; IGKV3-20|IDBG-403640|ENSG00000239951||; IGKV4-1|IDBG-123562|ENSG00000211598||;
2	FCGR activation	13007	REACTOME	5	21	8.70424	IGHG1; IGHG3; IGKC; IGKV3-20; IGKV4-1	IGHG1|IDBG-124377|ENSG00000211896|102723479,102725426,102725526|; IGHG3|IDBG-124382|ENSG00000211897||; IGKC|IDBG-123549|ENSG00000211592|102724332|; IGKV3-20|IDBG-403640|ENSG00000239951||; IGKV4-1|IDBG-123562|ENSG00000211598||;
2	Initial triggering of complement	13054	REACTOME	5	29	8.06669	IGHG1; IGHG3; IGKC; IGKV3-20; IGKV4-1	IGHG1|IDBG-124377|ENSG00000211896|102723479,102725426,102725526|; IGHG3|IDBG-124382|ENSG00000211897||; IGKC|IDBG-123549|ENSG00000211592|102724332|; IGKV3-20|IDBG-403640|ENSG00000239951||; IGKV4-1|IDBG-123562|ENSG00000211598||;
2	Role of phospholipids in phagocytosis	13006	REACTOME	5	34	7.79606	IGHG1; IGHG3; IGKC; IGKV3-20; IGKV4-1	IGHG1|IDBG-124377|ENSG00000211896|102723479,102725426,102725526|; IGHG3|IDBG-124382|ENSG00000211897||; IGKC|IDBG-123549|ENSG00000211592|102724332|; IGKV3-20|IDBG-403640|ENSG00000239951||; IGKV4-1|IDBG-123562|ENSG00000211598||;
2	Complement cascade	19237	REACTOME	5	47	7.13976	IGHG1; IGHG3; IGKC; IGKV3-20; IGKV4-1	IGHG1|IDBG-124377|ENSG00000211896|102723479,102725426,102725526|; IGHG3|IDBG-124382|ENSG00000211897||; IGKC|IDBG-123549|ENSG00000211592|102724332|; IGKV3-20|IDBG-403640|ENSG00000239951||; IGKV4-1|IDBG-123562|ENSG00000211598||;
2	Scavenging of heme from plasma	13097	REACTOME	4	20	6.82625	IGHA1; IGKC; IGKV3-20; IGKV4-1	IGHA1|IDBG-124374|ENSG00000211895||; IGKC|IDBG-123549|ENSG00000211592|102724332|; IGKV3-20|IDBG-403640|ENSG00000239951||; IGKV4-1|IDBG-123562|ENSG00000211598||;
2	Regulation of actin dynamics for phagocytic cup formation	13005	REACTOME	5	66	6.50792	IGHG1; IGHG3; IGKC; IGKV3-20; IGKV4-1	IGHG1|IDBG-124377|ENSG00000211896|102723479,102725426,102725526|; IGHG3|IDBG-124382|ENSG00000211897||; IGKC|IDBG-123549|ENSG00000211592|102724332|; IGKV3-20|IDBG-403640|ENSG00000239951||; IGKV4-1|IDBG-123562|ENSG00000211598||;
2	Fcgamma receptor (FCGR) dependent phagocytosis	18888	REACTOME	5	89	5.90256	IGHG1; IGHG3; IGKC; IGKV3-20; IGKV4-1	IGHG1|IDBG-124377|ENSG00000211896|102723479,102725426,102725526|; IGHG3|IDBG-124382|ENSG00000211897||; IGKC|IDBG-123549|ENSG00000211592|102724332|; IGKV3-20|IDBG-403640|ENSG00000239951||; IGKV4-1|IDBG-123562|ENSG00000211598||;
2	Antigen activates B Cell Receptor (BCR) leading to generation of second messengers	13095	REACTOME	4	38	5.80676	BLNK; IGKC; IGKV3-20; IGKV4-1	BLNK|IDBG-83724|ENSG00000095585|29760|; IGKC|IDBG-123549|ENSG00000211592|102724332|; IGKV3-20|IDBG-403640|ENSG00000239951||; IGKV4-1|IDBG-123562|ENSG00000211598||;
2	Binding and Uptake of Ligands by Scavenger Receptors	17884	REACTOME	4	47	5.46922	IGHA1; IGKC; IGKV3-20; IGKV4-1	IGHA1|IDBG-124374|ENSG00000211895||; IGKC|IDBG-123549|ENSG00000211592|102724332|; IGKV3-20|IDBG-403640|ENSG00000239951||; IGKV4-1|IDBG-123562|ENSG00000211598||;
2	B cell receptor signaling	16132	INOH	4	52	5.32814	BLNK; IGKC; IGKV3-20; IGKV4-1;	BLNK|IDBG-83724|ENSG00000095585|29760|; IGKC|IDBG-123549|ENSG00000211592|102724332|; IGKV3-20|IDBG-403640|ENSG00000239951||; IGKV4-1|IDBG-123562|ENSG00000211598||;
2	FCERI mediated Ca+2 mobilization	19496	REACTOME	3	37	4.09339	IGKC; IGKV3-20; IGKV4-1	IGKC|IDBG-123549|ENSG00000211592|102724332|; IGKV3-20|IDBG-403640|ENSG00000239951||; IGKV4-1|IDBG-123562|ENSG00000211598||;
2	FCERI mediated NF-kB activation	16799	REACTOME	3	37	4.09339	IGKC; IGKV3-20; IGKV4-1	IGKC|IDBG-123549|ENSG00000211592|102724332|; IGKV3-20|IDBG-403640|ENSG00000239951||; IGKV4-1|IDBG-123562|ENSG00000211598||;
2	Immune System	18444	REACTOME	9	1127	4.05159	BLNK; IGHG1; IGHG3; IGKC; IGKV3-20; IGKV4-1; IRF4; ISG20; ZBP1	BLNK|IDBG-83724|ENSG00000095585|29760|; IGHG1|IDBG-124377|ENSG00000211896|102723479,102725426,102725526|; IGHG3|IDBG-124382|ENSG00000211897||; IGKC|IDBG-123549|ENSG00000211592|102724332|; IGKV3-20|IDBG-403640|ENSG00000239951||; IGKV4-1|IDBG-123562|ENSG00000211598||; IRF4|IDBG-55681|ENSG00000137265|3662|; ISG20|IDBG-28713|ENSG00000172183|3669|; ZBP1|IDBG-82385|ENSG00000124256|81030|;
2	FCERI mediated MAPK activation	19852	REACTOME	3	49	3.78211	IGKC; IGKV3-20; IGKV4-1	IGKC|IDBG-123549|ENSG00000211592|102724332|; IGKV3-20|IDBG-403640|ENSG00000239951||; IGKV4-1|IDBG-123562|ENSG00000211598||;
2	IL4-mediated signaling events	15439	PID NCI	3	60	3.54476	IGHG1; IGHG3; IRF4;	IGHG1|IDBG-124377|ENSG00000211896|102723479,102725426,102725526|; IGHG3|IDBG-124382|ENSG00000211897||; IRF4|IDBG-55681|ENSG00000137265|3662|;
2	Immunoregulatory interactions between a Lymphoid and a non-Lymphoid cell	13066	REACTOME	3	71	3.35203	IGKC; IGKV3-20; IGKV4-1	IGKC|IDBG-123549|ENSG00000211592|102724332|; IGKV3-20|IDBG-403640|ENSG00000239951||; IGKV4-1|IDBG-123562|ENSG00000211598||;
2	Innate Immune System	17476	REACTOME	6	563	3.34136	IGHG1; IGHG3; IGKC; IGKV3-20; IGKV4-1; ZBP1	IGHG1|IDBG-124377|ENSG00000211896|102723479,102725426,102725526|; IGHG3|IDBG-124382|ENSG00000211897||; IGKC|IDBG-123549|ENSG00000211592|102724332|; IGKV3-20|IDBG-403640|ENSG00000239951||; IGKV4-1|IDBG-123562|ENSG00000211598||; ZBP1|IDBG-82385|ENSG00000124256|81030|;
2	Signaling by the B Cell Receptor (BCR)	19561	REACTOME	4	188	3.32192	BLNK; IGKC; IGKV3-20; IGKV4-1	BLNK|IDBG-83724|ENSG00000095585|29760|; IGKC|IDBG-123549|ENSG00000211592|102724332|; IGKV3-20|IDBG-403640|ENSG00000239951||; IGKV4-1|IDBG-123562|ENSG00000211598||;
2	Role of LAT2/NTAL/LAB on calcium mobilization	17405	REACTOME	3	101	2.96845	IGKC; IGKV3-20; IGKV4-1	IGKC|IDBG-123549|ENSG00000211592|102724332|; IGKV3-20|IDBG-403640|ENSG00000239951||; IGKV4-1|IDBG-123562|ENSG00000211598||;
2	Primary immunodeficiency	2815	KEGG	2	37	2.54885	BLNK; IGLL1;	BLNK|IDBG-83724|ENSG00000095585|29760|; IGLL1|IDBG-2433|ENSG00000128322|3543|;
2	Fc epsilon receptor (FCERI) signaling	17802	REACTOME	3	173	2.3355	IGKC; IGKV3-20; IGKV4-1	IGKC|IDBG-123549|ENSG00000211592|102724332|; IGKV3-20|IDBG-403640|ENSG00000239951||; IGKV4-1|IDBG-123562|ENSG00000211598||;
2	Interferon alpha/beta signaling	13074	REACTOME	2	59	2.18677	IRF4; ISG20	IRF4|IDBG-55681|ENSG00000137265|3662|; ISG20|IDBG-28713|ENSG00000172183|3669|;
2	Salivary secretion	10375	KEGG	2	91	1.85692	CAMP; CD38;	CAMP|IDBG-32341|ENSG00000164047|820|; CD38|IDBG-10668|ENSG00000004468|952|;
2	Cytokine Signaling in Immune system	17418	REACTOME	3	267	1.84826	BLNK; IRF4; ISG20	BLNK|IDBG-83724|ENSG00000095585|29760|; IRF4|IDBG-55681|ENSG00000137265|3662|; ISG20|IDBG-28713|ENSG00000172183|3669|;
2	Cell surface interactions at the vascular wall	13112	REACTOME	2	98	1.81173	CEACAM8; OLR1	CEACAM8|IDBG-54589|ENSG00000124469|1088|; OLR1|IDBG-18612|ENSG00000173391|4973|;
2	Adaptive Immune System	18371	REACTOME	4	604	1.65137	BLNK; IGKC; IGKV3-20; IGKV4-1	BLNK|IDBG-83724|ENSG00000095585|29760|; IGKC|IDBG-123549|ENSG00000211592|102724332|; IGKV3-20|IDBG-403640|ENSG00000239951||; IGKV4-1|IDBG-123562|ENSG00000211598||;
2	Interferon Signaling	18059	REACTOME	2	158	1.4531	IRF4; ISG20	IRF4|IDBG-55681|ENSG00000137265|3662|; ISG20|IDBG-28713|ENSG00000172183|3669|;
2	Calcium signaling pathway	594	KEGG	2	183	1.35103	CD38; SLC25A4;	CD38|IDBG-10668|ENSG00000004468|952|; SLC25A4|IDBG-46664|ENSG00000151729|291|;
3	IL1-mediated signaling events	15122	PID NCI	5	31	2.57732	IL1R1; IL1R2; IL1RAP; IRAK3; MAP2K6;	IL1R1|IDBG-64088|ENSG00000115594|3554|; IL1R2|IDBG-64053|ENSG00000115590|7850|; IL1RAP|IDBG-69682|ENSG00000196083|3556|; IRAK3|IDBG-45584|ENSG00000090376|11213|; MAP2K6|IDBG-66516|ENSG00000108984|5608|;
3	IL1	15917	NETPATH	7	70	2.55264	IL1R1; IL1R2; IL1RAP; IRAK3; MAP2K3; MAP2K6; S100B;	IL1R1|IDBG-64088|ENSG00000115594|3554|; IL1R2|IDBG-64053|ENSG00000115590|7850|; IL1RAP|IDBG-69682|ENSG00000196083|3556|; IRAK3|IDBG-45584|ENSG00000090376|11213|; MAP2K3|IDBG-35553|ENSG00000034152|100996792,5606|; MAP2K6|IDBG-66516|ENSG00000108984|5608|; S100B|IDBG-6570|ENSG00000160307|6285|;
3	Signal transduction through il1r	4064	PID BIOCARTA	5	35	2.48713	IL1R1; IL1RAP; IRAK3; MAP2K3; MAP2K6;	IL1R1|IDBG-64088|ENSG00000115594|3554|; IL1RAP|IDBG-69682|ENSG00000196083|3556|; IRAK3|IDBG-45584|ENSG00000090376|11213|; MAP2K3|IDBG-35553|ENSG00000034152|100996792,5606|; MAP2K6|IDBG-66516|ENSG00000108984|5608|;
3	Metabolism	19429	REACTOME	32	1535	2.09731	ACER3; ACOX2; ACSL4; ADCY3; ALOX5AP; ARG1; CBS; CSGALNACT2; CYP19A1; CYP1B1; DSE; GALC; GGT1; GNAQ; GSTO1; GYG1; HMOX1; HPGD; HSD3B7; IDI1; LDHA; NDST2; OPLAH; PDSS1; PFKFB2; PFKFB3; PPARG; SGSH; SLC2A3; STX1A; TPK1; UPP1	ACER3|IDBG-65242|ENSG00000078124|55331|; ACOX2|IDBG-42297|ENSG00000168306|8309|; ACSL4|IDBG-82250|ENSG00000068366|2182|; ADCY3|IDBG-34125|ENSG00000138031|109|; ALOX5AP|IDBG-21438|ENSG00000132965|241|; ARG1|IDBG-96496|ENSG00000118520|383|; CBS|IDBG-4623|ENSG00000160200|102724560,875|; CSGALNACT2|IDBG-71219|ENSG00000169826|55454|; CYP19A1|IDBG-11985|ENSG00000137869|1588|; CYP1B1|IDBG-46038|ENSG0000…
3	Hypoxia-inducible factor in the cardivascular system	3949	PID BIOCARTA	3	16	1.44215	ASPH; HIF1A; LDHA;	ASPH|IDBG-23064|ENSG00000198363|444|; HIF1A|IDBG-8510|ENSG00000100644|3091|; LDHA|IDBG-34863|ENSG00000134333|3939|;
3	IL-1 signaling pathway	16110	INOH	4	40	1.37317	IL1R1; IL1RAP; MAP2K3; MAP2K6;	IL1R1|IDBG-64088|ENSG00000115594|3554|; IL1RAP|IDBG-69682|ENSG00000196083|3556|; MAP2K3|IDBG-35553|ENSG00000034152|100996792,5606|; MAP2K6|IDBG-66516|ENSG00000108984|5608|;
3	Interleukin-1 signaling	13078	REACTOME	4	43	1.32043	IL1R1; IL1R2; IRAK3; MAP2K6	IL1R1|IDBG-64088|ENSG00000115594|3554|; IL1R2|IDBG-64053|ENSG00000115590|7850|; IRAK3|IDBG-45584|ENSG00000090376|11213|; MAP2K6|IDBG-66516|ENSG00000108984|5608|;
	Transcription Factor
1	IRF7	IRF-7A	CisRED	15	1142	1.8	ADRB2; BTN3A2; CD27; CDIP1; CEBPE; GSDMB; HVCN1; LAX1; PLEKHO1; PRKAR1B; RARRES3; SLC25A23; SULF2; SYNE2; ZNF502	0.0237728
	GOTerms
1	MHC class II protein complex	GO:0042613	cellular component	7	16	9.68098	CD74; HLA-DMA; HLA-DMB; HLA-DOA; HLA-DPA1; HLA-DPB1; HLA-DRA	2.08456e-10
1	Immune response	GO:0006955	biological process	13	367	5.74903	CCL5; CD40LG; CD74; CD8B; HLA-DMA; HLA-DMB; HLA-DOA; HLA-DPA1; HLA-DPB1; HLA-DRA; LAX1; PF4; PPBP	1.78227e-06
1	MHC class II protein complex binding	GO:0023026	molecular function	5	16	5.62626	CD74; HLA-DMA; HLA-DMB; HLA-DOA; HLA-DRA	2.36449e-06
1	Antigen processing and presentation	GO:0019882	biological process	7	64	5.6215	CD74; HLA-DMA; HLA-DMB; HLA-DOA; HLA-DPA1; HLA-DPB1; HLA-DRA	2.39057e-06
1	Antigen processing and presentation of peptide or polysaccharide antigen via MHC class II	GO:0002504	biological process	4	9	5.17497	HLA-DMA; HLA-DPA1; HLA-DPB1; HLA-DRA	6.68383e-06
1	Peptide antigen assembly with MHC class II protein complex	GO:0002503	biological process	3	3	4.97273	HLA-DMA; HLA-DMB; HLA-DRA	1.0648e-05
1	Antigen processing and presentation of exogenous peptide antigen via MHC class II	GO:0019886	biological process	7	90	4.82405	CD74; HLA-DMA; HLA-DMB; HLA-DOA; HLA-DPA1; HLA-DPB1; HLA-DRA	1.49951e-05
1	Integral component of lumenal side of endoplasmic reticulum membrane	GO:0071556	cellular component	4	24	3.47483	CD74; HLA-DPA1; HLA-DPB1; HLA-DRA	0.000335095
1	MHC class II receptor activity	GO:0032395	molecular function	3	9	3.27856	HLA-DOA; HLA-DPA1; HLA-DRA	0.00052655
1	Clathrin-coated endocytic vesicle membrane	GO:0030669	cellular component	4	28	3.24692	CD74; HLA-DPA1; HLA-DPB1; HLA-DRA	0.000566341
1	Lysosomal membrane	GO:0005765	cellular component	8	234	3.21412	CD74; HLA-DMA; HLA-DMB; HLA-DOA; HLA-DPA1; HLA-DPB1; HLA-DRA; KIAA1324	0.000610767
1	Immunoglobulin mediated immune response	GO:0016064	biological process	3	11	3.13423	CD27; CD74; HLA-DMA	0.000734117
1	ER to Golgi transport vesicle membrane	GO:0012507	cellular component	4	32	3.13305	CD74; HLA-DPA1; HLA-DPB1; HLA-DRA	0.000736116
1	Transport vesicle membrane	GO:0030658	cellular component	4	33	3.11315	CD74; HLA-DPA1; HLA-DPB1; HLA-DRA	0.000770643
1	Cell surface	GO:0009986	cellular component	10	432	3.03311	CD2; CD27; CD74; CD8B; CXCR3; HLA-DMA; HLA-DPA1; HLA-DPB1; HLA-DRA; SULF2	0.00092659
1	Trans-Golgi network membrane	GO:0032588	cellular component	4	36	3.02142	CD74; HLA-DPA1; HLA-DPB1; HLA-DRA	0.000951879
1	Lysosome	GO:0005764	cellular component	7	207	2.79631	ADRB2; CD74; GIMAP5; HLA-DMA; HLA-DRA; KIAA1324; TLR7	0.00159842
1	Integral component of plasma membrane	GO:0005887	cellular component	15	1063	2.6438	ADRB2; CCR3; CD2; CD27; CD40LG; CD8B; CX3CR1; CXCR3; GP1BB; HLA-DPA1; HLA-DRA; HVCN1; KIAA1324; TNFRSF25; TRABD2A	0.00227089
1	T cell receptor signaling pathway	GO:0050852	biological process	5	93	2.6431	BTN3A1; HLA-DPA1; HLA-DPB1; HLA-DRA; TRAC	0.00227458
1	Endocytic vesicle membrane	GO:0030666	cellular component	4	52	2.5071	CD74; HLA-DPA1; HLA-DPB1; HLA-DRA	0.00311097
1	Cell surface receptor signaling pathway	GO:0007166	biological process	7	238	2.50517	ADRB2; CD2; CD27; CXCR3; EVL; GP1BB; TNFRSF25	0.00312483
1	Chemokine receptor activity	GO:0004950	molecular function	3	20	2.50348	CCR3; CX3CR1; CXCR3	0.00313705
1	Negative regulation of angiogenesis	GO:0016525	biological process	4	54	2.50319	CX3CR1; CXCR3; PF4; RGCC	0.00313916
1	Positive regulation of T cell proliferation	GO:0042102	biological process	4	57	2.42942	CCL5; HLA-DMB; HLA-DPA1; HLA-DPB1	0.00372029
1	External side of plasma membrane	GO:0009897	cellular component	6	192	2.23881	CD2; CD27; CD40LG; CD74; CD8B; CXCR3	0.00577024
1	Immunoglobulin secretion	GO:0048305	biological process	2	5	2.22707	CD40LG; LAX1	0.00592835
1	Peptide antigen binding	GO:0042605	molecular function	3	26	2.2262	HLA-DPA1; HLA-DPB1; HLA-DRA	0.00594025
1	T cell costimulation	GO:0031295	biological process	4	69	2.17352	HLA-DPA1; HLA-DPB1; HLA-DRA; TRAC	0.00670622
1	Chemokine-mediated signaling pathway	GO:0070098	biological process	3	32	2.00134	CCL5; CCR3; CX3CR1	0.00996922
1	Positive regulation of cAMP metabolic process	GO:0030816	biological process	2	7	1.9865	CXCR3; PF4	0.0103156
1	Inflammatory response	GO:0006954	biological process	7	315	1.94354	CCL5; CCR3; CD40LG; CHI3L1; CXCR3; RPS6KA5; TLR7	0.0113884
1	Late endosome membrane	GO:0031902	cellular component	4	82	1.93041	HLA-DMA; HLA-DMB; HLA-DRA; KIAA1324	0.0117378
1	Interferon-gamma secretion	GO:0072643	biological process	2	8	1.92975	BTN3A1; BTN3A2	0.0117558
1	Negative regulation of T cell apoptotic process	GO:0070233	biological process	2	8	1.92975	CCL5; CD27	0.0117558
1	Negative regulation of extrinsic apoptotic signaling pathway in absence of ligand	GO:2001240	biological process	3	36	1.90472	CX3CR1; KIAA1324; PF4	0.0124532
1	Regulation of T cell differentiation	GO:0045580	biological process	2	9	1.83408	CD2; HLA-DOA	0.0146529
1	Positive regulation of angiogenesis	GO:0045766	biological process	4	96	1.77166	CCR3; CHI3L1; CX3CR1; CXCR3	0.0169175
1	Endosome membrane	GO:0010008	cellular component	5	167	1.76135	HLA-DMA; HLA-DOA; HLA-DPA1; HLA-DPB1; TLR7	0.017324
1	Positive thymic T cell selection	GO:0045059	biological process	2	10	1.7503	CD74; HLA-DMA	0.0177704
1	Chaperone mediated protein folding requiring cofactor	GO:0051085	biological process	2	11	1.70897	CD74; HLA-DMA	0.0195448
1	Positive regulation of endothelial cell apoptotic process	GO:2000353	biological process	2	11	1.70897	CD40LG; RGCC	0.0195448
1	Platelet alpha granule lumen	GO:0031093	cellular component	3	48	1.64162	F13A1; PF4; PPBP	0.0228233
1	Plasma membrane	GO:0005886	cellular component	28	3645	1.63999	ADRB2; BTN3A1; BTN3A2; C6orf25; CCR3; CD2; CD40LG; CD74; CD8B; CX3CR1; CXCR3; GNG11; GP1BB; HLA-DOA; HLA-DPA1; HLA-DPB1; HLA-DRA; HSP90B1; HVCN1; LAX1; PLEKHO1; PRKAR1B; SGK1; SMPD3; SULF2; TLR7; TNFRSF25; TRAC	0.0229092
1	Low-density lipoprotein particle receptor binding	GO:0050750	molecular function	2	13	1.62817	HSP90B1; LDLRAP1	0.0235415
1	Negative regulation of cytokine secretion	GO:0050710	biological process	2	13	1.62817	BTN2A2; RGCC	0.0235415
1	Positive regulation of cAMP-mediated signaling	GO:0043950	biological process	2	13	1.62817	CXCR3; PF4	0.0235415
1	T cell activation	GO:0042110	biological process	3	50	1.62001	CD2; CD8B; HSH2D	0.0239879
1	Chemokine activity	GO:0008009	molecular function	3	50	1.62001	CCL5; PF4; PPBP	0.0239879
1	Macrophage chemotaxis	GO:0048246	biological process	2	14	1.57141	CCL5; CX3CR1	0.0268282
1	Positive regulation of T cell differentiation	GO:0045582	biological process	2	15	1.51927	CD74; HLA-DMA	0.0302504
1	Platelet activation	GO:0030168	biological process	5	205	1.49513	CD40LG; F13A1; GP1BB; PF4; PPBP	0.0319793
1	Chemotaxis	GO:0006935	biological process	4	126	1.46065	CCL5; CCR3; CX3CR1; CXCR3	0.0346218
1	Interferon-gamma-mediated signaling pathway	GO:0060333	biological process	3	61	1.44216	HLA-DPA1; HLA-DPB1; HLA-DRA	0.036128
1	C-X3-C chemokine receptor activity	GO:0016495	molecular function	1	1	1.40107	CX3CR1	0.0397132
1	MHC class II protein binding, via antigen binding groove	GO:0042658	molecular function	1	1	1.40107	CD74	0.0397132
1	MHC class II protein complex assembly	GO:0002399	biological process	1	1	1.40107	HLA-DMB	0.0397132
1	NOS2-CD74 complex	GO:0035693	cellular component	1	1	1.40107	CD74	0.0397132
1	Adenine nucleotide transport	GO:0051503	biological process	1	1	1.40107	SLC25A23	0.0397132
1	Antigen processing and presentation of endogenous antigen	GO:0019883	biological process	1	1	1.40107	CD74	0.0397132
1	Beta2-adrenergic receptor activity	GO:0004941	molecular function	1	1	1.40107	ADRB2	0.0397132
1	Chemokine receptor antagonist activity	GO:0046817	molecular function	1	1	1.40107	CCL5	0.0397132
1	Histone H2A-S1 phosphorylation	GO:0043990	biological process	1	1	1.40107	RPS6KA5	0.0397132
1	Macrophage migration inhibitory factor binding	GO:0035718	molecular function	1	1	1.40107	CD74	0.0397132
1	Macrophage migration inhibitory factor receptor complex	GO:0035692	cellular component	1	1	1.40107	CD74	0.0397132
1	Macrophage migration inhibitory factor signaling pathway	GO:0035691	biological process	1	1	1.40107	CD74	0.0397132
1	Negative regulation of exit from mitosis	GO:0001100	biological process	1	1	1.40107	RGCC	0.0397132
1	Negative regulation of mitotic cell cycle phase transition	GO:1901991	biological process	1	1	1.40107	RGCC	0.0397132
1	Negative regulation of peptide secretion	GO:0002792	biological process	1	1	1.40107	CD74	0.0397132
1	Olfactory bulb axon guidance	GO:0071678	biological process	1	1	1.40107	BCL11B	0.0397132
1	Ornithine decarboxylase activity	GO:0004586	molecular function	1	1	1.40107	ODC1	0.0397132
1	Positive regulation of T cell activation via T cell receptor contact with antigen bound to MHC molecule on antigen presenting cell	GO:2001190	biological process	1	1	1.40107	HLA-DMB	0.0397132
1	Positive regulation of autophagic vacuole assembly	GO:2000786	biological process	1	1	1.40107	KIAA1324	0.0397132
1	Positive regulation of cholesterol metabolic process	GO:0090205	biological process	1	1	1.40107	LDLRAP1	0.0397132
1	Positive regulation of myeloid dendritic cell activation	GO:0030887	biological process	1	1	1.40107	CD2	0.0397132
1	Positive regulation of vacuole organization	GO:0044090	biological process	1	1	1.40107	KIAA1324	0.0397132
1	Putrescine biosynthetic process from ornithine	GO:0033387	biological process	1	1	1.40107	ODC1	0.0397132
1	Receptor signaling protein tyrosine kinase activator activity	GO:0030298	molecular function	1	1	1.40107	CCL5	0.0397132
1	Regulation of chronic inflammatory response	GO:0002676	biological process	1	1	1.40107	CCL5	0.0397132
1	Regulation of eIF2 alpha phosphorylation by dsRNA	GO:0060735	biological process	1	1	1.40107	NPM1	0.0397132
1	Regulation of endoribonuclease activity	GO:0060699	biological process	1	1	1.40107	NPM1	0.0397132
1	Regulation of gastric acid secretion	GO:0060453	biological process	1	1	1.40107	SGK1	0.0397132
1	Regulation of leukocyte migration	GO:0002685	biological process	1	1	1.40107	CXCR3	0.0397132
1	Regulation of systemic arterial blood pressure by norepinephrine-epinephrine	GO:0001993	biological process	1	1	1.40107	ADRB2	0.0397132
1	Striatal medium spiny neuron differentiation	GO:0021773	biological process	1	1	1.40107	BCL11B	0.0397132
1	Urea homeostasis	GO:0097274	biological process	1	1	1.40107	SLC25A23	0.0397132
1	Response to stress	GO:0006950	biological process	3	77	1.37611	HSP90B1; NPM1; SGK1	0.0420619
1	Cytokine-mediated signaling pathway	GO:0019221	biological process	5	249	1.37567	CX3CR1; HLA-DPA1; HLA-DPB1; HLA-DRA; PF4	0.0421049
1	Golgi membrane	GO:0000139	cellular component	7	477	1.3668	CD74; HLA-DPA1; HLA-DPB1; HLA-DRA; SMPD3; ST6GAL1; TLR7	0.0429735
1	Innate immune response	GO:0045087	biological process	13	1331	1.36092	ADRB2; BTN3A1; BTN3A2; CCL5; CCR3; CD27; CEBPE; CXCR3; GSDMB; HSP90B1; PRKAR1B; RPS6KA5; TLR7	0.0435588
1	Blood coagulation	GO:0007596	biological process	7	483	1.34717	C6orf25; CD2; F13A1; GP1BB; PF4; PPBP; PRKAR1B	0.0449599
1	Platelet degranulation	GO:0002576	biological process	3	81	1.33871	F13A1; PF4; PPBP	0.0458448
1	Cellular response to interferon-gamma	GO:0071346	biological process	2	26	1.31629	CCL5; HLA-DPA1	0.0482741
1	Multivesicular body	GO:0005771	cellular component	2	20	1.3013	CD74; HLA-DMA	0.0499695
2	Antigen binding	GO:0003823	molecular function	7	33	8.50638	IGHA1; IGHG1; IGHG3; IGJ; IGKC; IGKV3-20; IGKV4-1;	3.11614e-09
2	Protein binding	GO:0005515	molecular function	53	9632	5.84891	BLNK; CAMP; CEACAM8; IDBG-304548; IGHA1; IGHG1; IGHG3; IGHM; IGHV1-18; IGHV1-2; IGHV1-3; IGHV1-69; IGHV3-15; IGHV3-16; IGHV3-20; IGHV3-23; IGHV3-35; IGHV3-48; IGHV3-49; IGHV3-74; IGHV3OR16-9; IGHV4-59; IGKC; IGKV1-16; IGKV1-27; IGKV1D-16; IGKV1D-33; IGKV1D-43; IGKV1D-8; IGKV2D-24; IGKV3-20; IGKV3-7; IGKV3D-11; IGKV3D-15; IGKV4-1; IGLC2; IGLL1; IGLV1-36; IGLV1-44; IGLV1-47; IGLV2-14; IGLV2-23; IRF…	1.41608e-06
2	Monomeric IgA immunoglobulin complex	GO:0071748	cellular component	3	3	5.63831	IGHA1; IGJ; IGKV3-20	2.29979e-06
2	Secretory IgA immunoglobulin complex	GO:0071751	cellular component	3	3	5.63831	IGHA1; IGJ; IGKV3-20	2.29979e-06
2	Blood microparticle	GO:0072562	cellular component	7	122	5.18754	IGHA1; IGHG1; IGHG3; IGJ; IGKC; IGKV3-20; IGKV4-1	6.4932e-06
2	Complement activation	GO:0006956	biological process	5	37	5.15167	IGHG1; IGHG3; IGKC; IGKV3-20; IGKV4-1	7.05236e-06
2	Complement activation, classical pathway	GO:0006958	biological process	5	40	5.12221	IGHG1; IGHG3; IGKC; IGKV3-20; IGKV4-1	7.54721e-06
2	Immunoglobulin receptor binding	GO:0034987	molecular function	3	5	4.94137	IGHA1; IGJ; IGKV3-20	1.14453e-05
2	Antibacterial humoral response	GO:0019731	biological process	4	27	4.27747	CAMP; IGHA1; IGJ; IGKV3-20	5.27874e-05
2	Glomerular filtration	GO:0003094	biological process	3	11	3.82689	IGHA1; IGJ; IGKV3-20	0.000148975
2	Fc-gamma receptor signaling pathway involved in phagocytosis	GO:0038096	biological process	5	82	3.74652	IGHG1; IGHG3; IGKC; IGKV3-20; IGKV4-1	0.000179259
2	Retina homeostasis	GO:0001895	biological process	4	40	3.6996	IGHA1; IGHG3; IGJ; IGKC	0.000199708
2	Pentameric IgM immunoglobulin complex	GO:0071756	cellular component	2	2	3.68288	IGJ; IGKV3-20	0.00020755
2	Secretory dimeric IgA immunoglobulin complex	GO:0071752	cellular component	2	2	3.68288	IGHA1; IGJ	0.00020755
2	Positive regulation of respiratory burst	GO:0060267	biological process	2	5	2.71559	IGHA1; IGJ	0.0019249
2	Immune response	GO:0006955	biological process	7	367	2.48506	CEACAM8; IGHA1; IGJ; IGKC; IGKV3-20; IGKV4-1; IGLL1	0.00327298
2	U1 snRNA binding	GO:0030619	molecular function	1	1	1.5068	ISG20	0.0311316
2	U3 snoRNA binding	GO:0034511	molecular function	1	1	1.5068	ISG20	0.0311316
2	Cell wall	GO:0005618	cellular component	1	1	1.5068	CAMP	0.0311316
2	Dimeric IgA immunoglobulin complex	GO:0071750	cellular component	1	1	1.5068	IGJ	0.0311316
2	Exoribonuclease II activity	GO:0008859	molecular function	1	1	1.5068	ISG20	0.0311316
2	Fructose transmembrane transporter activity	GO:0005353	molecular function	1	1	1.5068	SLC2A5	0.0311316
2	Fructose transport	GO:0015755	biological process	1	1	1.5068	SLC2A5	0.0311316
2	Hydroxypyruvate isomerase activity	GO:0008903	molecular function	1	1	1.5068	HYI	0.0311316
2	Left-handed Z-DNA binding	GO:0003692	molecular function	1	1	1.5068	ZBP1	0.0311316
2	Negative regulation of growth of symbiont on or near host surface	GO:0044140	biological process	1	1	1.5068	CAMP	0.0311316
2	Positive regulation of immunoglobulin biosynthetic process	GO:0002642	biological process	1	1	1.5068	MZB1	0.0311316
2	Positive regulation of interleukin-13 biosynthetic process	GO:0045368	biological process	1	1	1.5068	IRF4	0.0311316
2	Regulation of T-helper cell differentiation	GO:0045622	biological process	1	1	1.5068	IRF4	0.0311316
2	Regulation of immune response	GO:0050776	biological process	3	92	1.50434	IGKC; IGKV3-20; IGKV4-1	0.031308
2	NAD(P)+ nucleosidase activity	GO:0050135	molecular function	1	2	1.31227	CD38	0.0487224
2	U2 snRNA binding	GO:0030620	molecular function	1	2	1.31227	ISG20	0.0487224
2	Adenine transmembrane transporter activity	GO:0015207	molecular function	1	2	1.31227	SLC25A4	0.0487224
2	Cellular response to fructose stimulus	GO:0071332	biological process	1	2	1.31227	SLC2A5	0.0487224
2	Killing by host of symbiont cells	GO:0051873	biological process	1	2	1.31227	CAMP	0.0487224
2	Positive regulation of interleukin-10 biosynthetic process	GO:0045082	biological process	1	2	1.31227	IRF4	0.0487224
2	Positive regulation of interleukin-4 biosynthetic process	GO:0045404	biological process	1	2	1.31227	IRF4	0.0487224
3	Interleukin-1 receptor activity	GO:0004908	molecular function	4	7	3.71878	IL18R1; IL1R1; IL1R2; IL1RAP	0.000191082
3	Innate immune response	GO:0045087	biological process	33	1331	3.58658	ADCY3; AGFG1; ARG1; AZI2; BCL2A1; CD55; CD63; CEBPB; CLEC4D; CR1; DOK3; FCER1G; GPER; HIF1A; HMOX1; IL1R1; IL1R2; IL1RAP; IRAK3; IRS2; LGALS1; LGALS8; LILRA5; LRRFIP1; MAP2K3; MAP2K6; MERTK; PIK3AP1; PPARG; S100A12; S100B; TLR8; TNFAIP3	0.000259071
3	Small molecule metabolic process	GO:0044281	biological process	30	1421	2.06023	ACER3; ACOX2; ACSL4; ADCY3; ALOX5AP; ARG1; CBS; CSGALNACT2; CYP19A1; CYP1B1; DSE; GALC; GGT1; GSTO1; GYG1; HMOX1; HPGD; HSD3B7; IDI1; LDHA; NDST2; OPLAH; PDSS1; PFKFB2; PFKFB3; SGSH; SLC2A3; STX1A; TPK1; UPP1	0.00870507
3	Retina vasculature development in camera-type eye	GO:0061298	biological process	3	8	1.77897	CYP1B1; HIF1A; ROM1	0.0166354
3	Response to axon injury	GO:0048678	biological process	4	26	1.54574	ARG1; DPYSL3; LGALS1; TSPO	0.0284616
3	RAGE receptor binding	GO:0050786	molecular function	3	11	1.49464	FPR1; S100A12; S100B	0.0320155
3	Positive regulation of angiogenesis	GO:0045766	biological process	6	96	1.37535	CYP1B1; HGF; HIF1A; HMOX1; LRG1; RUNX1	0.0421355
3	B-1 B cell homeostasis	GO:0001922	biological process	2	3	1.35044	HIF1A; TNFAIP3	0.0446231
3	Plasma cell differentiation	GO:0002317	biological process	2	3	1.35044	LGALS1; LGALS8	0.0446231
3	Brown fat cell differentiation	GO:0050873	biological process	4	32	1.32945	CEBPB; LRG1; PLAC8; PPARG	0.0468331
