# Supplementary material for: Cathelicidin Insufficiency in Patients with Fatal Leptospirosis
Source: PLoS Pathog. 2016 Nov 3;12(11):e1005943. doi: 10.1371/journal.ppat.1005943 (PMC5094754; doi:10.1371/journal.ppat.1005943)
Supplement: S6 Table — (XLSX) [file ppat.1005943.s009.xlsx]

## Sheet: Table S6 Clin data
Table S6. Clinical signs and symptoms for patients with leptospirosis
	SURVIVORS		DEAD
CLINICAL LABORATORY	No.	Median (IQR) or No. (%)	No.	Median (IQR) or No. (%)	p-value
Gender (Male)	23	22 (96)	22	18 (82)	0.17
Hematocrit (%)	23	12.5 (11.4-13.0)	21	32.1 (27.6-35.7)	0.03
Minimum platelet count (1000/µL)	23	108 (39-185)	21	38 (20-94)	0.008
Maximum serum creatinine (mg/dL)	23	2.7 (1.7-5.4)	22	5.7 (3.4-7.3)	0.002
Maximum blood urea nitrogen (mg/dL)	23	98 (46-209)	22	182 (133-234)	0.01
Maximum serum potassium (meq/L)	23	4.3 (3.8-4.8)	21	5.0 (4.3-6.1)	0.04
IN-HOSPITAL COMPLICATIONS
Oliguria and/or anuria	23	5 (22)	22	19 (86)	<0.0001
Pulmonary hemorrhage	23	1 (4)	21	7 (33)	0.02
Acute Lung InjuryA	23	1 (4)	22	15 (68)	0.0004
OUTCOMES
Death	23	0 (0)	22	22 (100)	1
ICU admission	23	3 (13)	22	11 (50)	0.01
Mechanical ventilation	23	1 (4)	22	13 (59)	<0.0001
Dialysis	23	5 (22)	22	14 (64)	0.005
LABORATORY DATA
Acute phase agglutinating antibody titers	23	400 (1-1600)	21	1 (1-400)	0.02
Leptospira load (Geq/ml)	22	0 (0-254)	19	3286 (231-19574)	0.0004
A Massive lung hemorrhage (≥250ml) and/or mechanical ventilation
